# Supplementary material for: Shifting cultivation and hunting across the savanna-forest mosaic in the Gran Sabana, Venezuela: facing changes
Source: PeerJ journal article supplement (doi:10.7717/peerj.11612), 2021-06-17
Supplement: Hunting_informed_consent_GS.pdf [file Hunting_informed_consent_GS.pdf]

**Encuesta de uso de fauna: proyecto "Mamiferos de la Gran Sabna"**

Entrevista codigo #  Fecha

Localidad  Punto GPS

Señor(a). Mi nombre es Izabela Stachowicz, soy estudiante de doctorado en ecología en el Instituto Venezolano de Investigaciones Científicas, en donde realizo el estudio sobre la fauna de la Gran Sabana y los factores que la impactan como el fuego, cacería y deforestación. Nos gustaría nos conceda parte de su valioso tiempo para responder unas preguntas que nos permita comprender mejor la problemática socio-ambiental sobre la actividad de cacería en su comunidad. Es importante que sepa que sus respuestas son totalmente confidenciales y de uso exclusivo para la investigación. La participación en este estudio es completamente voluntaria. Si decide no participar, no habrá consecuencias negativas. Tenga en cuenta que si decide participar, puede dejar de participar en cualquier momento y puede decidir no responder a ninguna pregunta específica. De antemano agradecemos su disposición y colaboración en esta investigación.

Persona que da la informacion:

Criollo  Indigena  Edad  Sexo

Ocupación

¿Cuántas personas conforman su núcleo familiar?

¿Usted caza?

Metodo de caza

¿Que actividades realiza para conseguir alimentos? comprado  cazado  otra  regalado

¿Que animales se caza en la zona?

¿Que animales de esta lista se caza? LISTA

¿Cuál es la zona donde se consiguen más animales?

¿Tiene la zona preferible? si no como se llama?

bosque  sabana  rio  mixto   
otro

¿En que época del año se caza más animales?

¿Que otra actividad realiza?

Agricultura  Pesca  Ganaderia  Comercio

Turismo  Otra

**Encuesta de uso de fauna: proyecto "Mamíferos de la Gran Sabna"**

Entrevista #

Fecha

¿Alguien más en su familia caza? si  no

¿Qué animales y cuántos de c/u cazó usted? semana pasada..... el mes pasado.....

¿Qué animales y cuántos de c/a cazó usted?

|     | 1-2 por sem | semanal | 1-2 por mes | mensual | otra |
|-----|-------------|---------|-------------|---------|------|
| 1.  |             |         |             |         |      |
| 2.  |             |         |             |         |      |
| 3.  |             |         |             |         |      |
| 4.  |             |         |             |         |      |
| 5.  |             |         |             |         |      |
| 6.  |             |         |             |         |      |
| ... |             |         |             |         |      |

¿Para que utiliza los animales cazados? para comer

venta de carne venta de cuero  otro

¿Cuales animales son mas escasos hoy que antes?

DATOS DE LA ULTIMA FECHA DE CAZA No caza

¿Cuándo fue la última vez que fue a cazar?

¿Donde cazó? (distancia o tiempo desde su sitio de vivienda)

¿Cuánto tiempo estuve cazando?

¿Qué presas y cuantas trajo?

Gracias por brindarnos su valioso tiempo y proveernos de tan importante información para este proyecto.
