# Supplementary material for: Shifting cultivation and hunting across the savanna-forest mosaic in the Gran Sabana, Venezuela: facing changes
Source: PeerJ. 2021 Jun 17;9:e11612. doi: 10.7717/peerj.11612 (PMC8214850; doi:10.7717/peerj.11612)
Supplement: Supplemental Information 4 [file peerj-09-11612-s004.xlsx]

## Sheet: Arkusz3
interview	fecha	locality	Creole	indigenous	age	sex_M	sex_F	occupation	Family nucleus	if hunt	hunting method	Food: given away	Food: purchased	Food: hunted	Food: other	game animals 1	game animals 2	game animals 3	game animals 4	game animals 5	game animals 6	game animals 7	preferable hunting area YES	which one?	forest	savanna	river	mix of habitat	other	time of year for hunting	Activity: agriculture	Activity: fisihing	Activity: livestock	Activity: trade	Activity: tourism	Activity: other	who else hunts in the family	how many animlaes did you catch: last week	how many animals did you hunt: last month	Hunt for: Eating	Hunting for: sale of meat	Hunting for: leather	Hunting for: other	What animals are scarcer now?	When was the last hunt	where hunted?	what preys and how many?	comments
5	27-09-2015	Uroy-Uaray	0	1	43	0	1	community council member	4	no	0	0	1	0	conuco	white-tailed deer	paca	black curassow					si		1	1	0	1	0	don't know	1	1	1	0	1	mining	before family
6	28-09-2015	Wuarapata	0	1	43	1	0	head of the family	7	yes	shotgun	0	0	1	conuco	white-tailed deer	black curassow	spix's guan	agouti	paca			si	Achiparu	1	0	0	0	0	rainy season	1	1	0	0	0		siblings	0	0									no ammunition
14	28-09-2015	Uroy-Uaray	0	1	60	1	0	ex captain of Uroy	5	before	shotgun	0	1	0	conuco	white-tailed deer	paca	agouti					si		1	1	0	1	0	may August	1	1	0	0	0	0	sons	0	0	1	0	0	0					now the cartridges are very expensive or there are no
19	29-03-2016	Wuarapata	0	1	70	1	0	head of the family	9	yes	shotgun	0	0	1	conuco	paca	agouti	tapir	brocket	spix's guan	black curassow		si		1	0	0	0	0	May-August when the rain feasts	1	1	0	0	0	0	sons	0	0	1	0	0	0	brocket	christmas 2015	bosque de Wuarapata	brocket
28	1-04-2016	Mare Paru	0	1	60	1	0	ex captain of Mare Paru	6	yes	shotgun	0	1	1	conuco	paca	white-tailed deer	white-lipped peccary	brocketdel monte				si	Mare Paru	1	0	0	0	0	better rains, but it is hunted all year round	1	1	0	0	0	mining	sons	0	0	1	0	0	0		3 months ago
20	31-01-2016	Kadak	0	1	67	1	0	head of the family	14	yes	shotgun	0	0	1	conuco	paca	agouti	brocket					si	Mariparu y Kadak	1	0	0	0	0	may August	1	1	0	0	0	mining	sons	0	1	1	0	0	0	brocket	christmas 2015	Kadak	paca
9	30-09-2015	Wuarapata	0	1	60	1	0	hunter	5	yes	shotgun	0	0	1	conuco	white-tailed deer	tapir	paca	black curassow	tinamu			si	cerza del tepui	1	0	0	0	0	May-August when the rain feasts	1	1	0	0	1		sons	0	0	1	0	0	0	white-tailed deer y otros animales	a year ago			by religion they can only hunt the brocket. But he goes hunting when we go out closer to the tepui (October 6) and at night he goes hunting. He says he shot a tiger, he goes out in the camera trap. He didn't hunt anything, but he says he has a lot of experience hunting tapirs.
26	11-02-2016	Kawi	0	1	29	1	0	head of the family	9	before	shotgun	0	1	0	conuco	paca	brocket	white-tailed deer	spix's guan	tinamu			si		1	0	0	0	0	all year but more in rain	1	1	0	0	1		do not	0	0	1	0	0	0	brocket	a year ago
25	10-02-2016	Uroy-Uaray	0	1	40	1	0	captain of Uroy	5	yes	shotgun, now a little bowed	0	1	1	conuco	black curassow	paca	brocket					si		1	0	0	1	0	all year	1	0	0	0	1	crafts and minig	dad	0	1	1	0	0	0	white-tailed deer	this month, january 2016	Wuarapata	black curassow
18	30-01-2016	Wuarapata	0	1	25	1	0	he makes casave and fishes	8	yes	shotgun	0	0	1	conuco	white-tailed deer	paca	agouti	black curassow	spix's guan			si		1	1	0	1	0	May-August when the rain feasts	1	1	0	0	0	0	dad	0	1	1	0	0	0	menos brocket, mas dificil para cazar	christmas 2015	sabanas de Wuarapata	brocket
13	1-12-2015	Uroy-Uaray	0	1	35	1	0	community council member	6	before	shotgun	0	1	0	conuco	white-tailed deer	tapir	paca	agouti	black curassow			si		0	1	1	0	0		1	1	0	0	0	0	dad	0	0	1	0	0	0	todos se ven menos, porque se fueron mas al bosque, alla hay mucho	more than a year
1	24-09-2015	Kawi	0	1	33	0	1	tourism, captain in charge	6	no	0	1	1	0	0	paca	white-tailed deer	tinamu	black curassow						1	0	0	0	0	don't know	1	1	0	0	1		dad			1	0	0	0	menos en general
23	03-02-2016	Wuarapata	0	1	22	1	0	hunter, fisher	4	yes	shotgun	0	0	1	conuco	black curassow	pavo	tapir	brocket				si	bosque de Wuarapata	0	0	0	1	0	all year	1	1	0	0	0	crafts and minig	dad and brother	0	0	1	0	0	0	no se	time without hunting			no ammunition
22	31-01-2016	Kadak	0	1	28	1	0	head of the family	3	yes	shotgun	0	0	1	conuco	white-tailed deer	paca	agouti					si	Kadak	1	0	0	0	0	when it rains, for the holidays	1	1	0	0	0	mining	dad and brother	0	0	1	0	0	0	brocket	time without hunting			the cartridges are very expensive or there aren't
21	31-01-2016	Kadak	0	1	30	1	0	head of the family	4	yes	shotgun	0	0	1	conuco	black curassow	paca	pavo					si	Kadak	1	0	0	0	0	all year	1	1	0	0	0	mining	dad and brother	0	0	1	0	0	0		time without hunting			no cartridges to hunt
27	29-03-2016	Wurapata	0	1	35	1	0	hunter, miner	7	yes	shotgun	0	0	1	conuco	white-tailed deer	black curassow	paca	agouti	tapir	aves del monte		si	Achiparu	1	0	0	0	0	better rains, but it is hunted all year round	1	1	0	0	0	crafts and minig	dad and brother	0	0	1	0	0	0	white-tailed deer	last year			In March 2016 they stole the shotgun from the house, he is going to move to a safer place. Every time when he goes to the forest he has china for birds.
2	24-09-2015	Kawi	0	1	35	1	0	construction adn miner	6	yes	shotgun	0	1	1	0	white-tailed deer	paca	black curassow					si	El black curassow, no cerca del Kawi	1	0	0	1	0	all year	1	1	0	0	1	mining	dad, uncles	0	1	1	0	0	0	white-tailed deer	2015-09-20	el black curassow	white-lipped peccary de collar
17	29-01-2016	Achiparu	0	1	50	1	0	hunter	3	yes	shotgun	0	0	1	conuco	white-tailed deer	brocketdel bosque	tapir	black curassow	paca	agouti	white-lipped peccary	si	Achi y Guyana	1	0	0	0	0	better rain but hunt all year	1	1	0	0	0		cousins	0	0	1	0	0	0	menos de todo	more than 3 months			He asks me to buy a special hunting lamp (so that the eyes can be seen) and the 16 and 20 caliber bullets.
15	1-12-2015	Wuarapata	0	1	65	1	0	ex capitan de Wuarapata	5	no		0	0	1	conuco	white-tailed deer	armadillo	white-lipped peccary												August	1	1	0	1	1	crafts	Yes	0	0	1	0	0	0	brocket
8	29-09-2015	Wuarapata	0	1	40	1	0	community council member	3	yes	shotgun before now bow, arrows and china	0	0	1	conuco	white-tailed deer	paca	black curassow	tinamudel monte		tapir		si	pegado con el cerro	1	1	0	1	0	fiestas y cuando llueve	1	1	0	0	0	crafts	Yes	0	0	1	0	0	0	white-tailed deer	I haven't hunted for years			he is hunting the birds: the black curassow and tinamu and spix's guan. Sometimes brocket, but he does not hunt anymore because the religion does not allow it
3	25-09-2015	Kawi	0	1	40	1	0	tourism	7	yes	shotgun	0	1	1	0	white-tailed deer	paca	agouti	spix's guan	black curassow	tinamu		si		1	1	0	1	0	rainy season	1	1	0	0	1	0	father in law	1	0	1	0	0	0		2015-09-23	Sierra de Lema	paca
24	8-02-2016	Wuarapata	0	1	42	1	0	captain of Wurapata	5	yes	shotgun	0	0	1	conuco	white-tailed deer	paca	tinamu	tapir				si	dependiendo de la presa	1	1	0	1	0	fiestas y cuando llueve	1	1	0	0	0	mining	father in law	0	0	1	0	0	0	white-tailed deer	christmas 2015	Kawi y Anaway	white-tailed deer, caramerudo	now one cartridges is worth 3000-5000 bs and cannot be bought. Only for special occasions.
7	29-09-2015	Kadak	0	1	45	1	0	works in construciton	7	yes	shotgun	0	1	1		white-tailed deer	paca	white-lipped peccary	tapir				si	Mareparu	1	0	0	0	0	may August	1	1	0	0	0		father in law	0	0	1	0	0	0	white-tailed deer	0
10	01-10-2015	San Jose de Monorepa	0	1	50	1	0	head of the family	4	no, before yes		0	0	0	conuco	white-tailed deer	paca	tapir													1	1	0	0	0	0		0	0									he lives isolated, has time without hunting. He prefers to eat plants and fish.. He has several conucos, takes great care of his plants and gardens and has many vegetables and fruits for this type of land. He fights a lot with other indigenous people so that they do not burn the savannah and do not use barbasco to fish. His douther died from an unknown disease, she did not let the doctors cure he…
4	27-09-2015	Uroy-Uaray	0	1	28	1	0	community council member	6	no	0	1	1	0	conuco	white-tailed deer	paca													all year	1	1	0	0	1	mining
16	1-12-2015	Uroy-Uaray	0	1	42	1	0	driver	6	yes	shotgun	0	1	0	conuco	black curassow	white-tailed deer	paca					si		1	1	1	1	0	rainy season	1	0	0	1	0	transport		0	0	1	0	0	0		more than a year
12	01-12-2015	Uroy-Uaray	0	1	47	0	1	nurse	28	no		0	1	0		white-tailed deer	paca						si		0	1	0	0	0	don't know	0	1	0	1	0					1	0	0	0	brocket				Currently there is more scarcity of animals, hunting decreased because cartridges are very expensive, however, rarely does someone go hunting for family sustenance and the meat is not sold. Before, much more animals will be observed because there were few people, as the community has grown, the brockets have disappeared and they entered the forest and they are afraid of the noise of the cars pass…
11	30-11-2015	Panaderia (entre Kwai y Kamoiran)	0	1	40	1	0	owner of the bakery	4	before	shotgun	0	1	0	conuco	white-tailed deer	paca	agouti	black curassow	tinamu	tapir		si		1	1	0	1	0	all year	1	0	1	1	1													has his sheep, turkeys and horses and several herds
29	10-04-2016	Uroy-Uaray	0	1	25	1	0	head of the family	3	yes	shotgun	0	1	0	conuco	white-tailed deer	black curassow													all year	1	0	0	1	0													now I buy the shotgun to start hunting, I don't have much experience and it is very difficult to find the cartridges
