# Supplementary material for: Shifting cultivation and hunting across the savanna-forest mosaic in the Gran Sabana, Venezuela: facing changes
Source: PeerJ journal article supplement (doi:10.7717/peerj.11612), 2021-06-17
Supplement: supplementary-material-2.pdf [file supplementary-material-2.pdf]

# Test of garden hunting hypothesis for mammals in La Gran Sabana, Venezuela using occupancy models

Stachowicz, I; Ferrer-Paris, J.R.; Sanchez-Mercado, A. (in prep)

December 2, 2020

```
## `summarise()` ungrouping output (override with `.groups` argument)
```

## Results of latent abundance models for 29 species detected in camera trap surveys

We attempted modelling the abundance of 29 species detected during the camera trap survey. These species were detected in at least two different occasions:

```
eventos %>% group_by(species) %>% summarise(nr.events=n(),nr.fotos=sum(fotos),max.nr.individuals=max(nu
```

```
## `summarise()` ungrouping output (override with `.groups` argument)
```

| ##    | species        | nr.events | nr.fotos | max.nr.individuals |
|-------|----------------|-----------|----------|--------------------|
| ## 1  | D.marsupialis  | 2         | 6        | 1                  |
| ## 2  | L.wiedii       | 2         | 7        | 1                  |
| ## 3  | T.pecari       | 2         | 9        | 1                  |
| ## 4  | C.unicinctus   | 4         | 33       | 1                  |
| ## 5  | P.tajacu       | 4         | 15       | 2                  |
| ## 6  | O.virginianus  | 5         | 38       | 1                  |
| ## 7  | T.tetradactyla | 6         | 33       | 2                  |
| ## 8  | C.olivaceus    | 8         | 42       | 1                  |
| ## 9  | N.nasua        | 8         | 54       | 7                  |
| ## 10 | P.jacquacu     | 8         | 63       | 1                  |
| ## 11 | P.maximus      | 9         | 60       | 1                  |
| ## 12 | H.hydrochaeris | 10        | 192      | 3                  |
| ## 13 | D.imperfecta   | 14        | 51       | 1                  |
| ## 14 | L.pardalis     | 18        | 99       | 1                  |
| ## 15 | P.concolor     | 18        | 82       | 1                  |
| ## 16 | P.onca         | 18        | 73       | 1                  |
| ## 17 | E.barbara      | 21        | 166      | 1                  |
| ## 18 | M.tridactyla   | 21        | 152      | 1                  |
| ## 19 | T.major        | 24        | 112      | 2                  |
| ## 20 | M.americana    | 30        | 263      | 1                  |
| ## 21 | T.terrestris   | 33        | 186      | 2                  |
| ## 22 | D.novemcinctus | 38        | 1181     | 1                  |
| ## 23 | C.alector      | 48        | 777      | 4                  |
| ## 24 | D.kappleri     | 52        | 248      | 1                  |
| ## 25 | M.gouazoubira  | 66        | 712      | 2                  |
| ## 26 | L.rufaxilla    | 68        | 385      | 2                  |
| ## 27 | C.thous        | 76        | 246      | 2                  |
| ## 28 | D.leporina     | 194       | 1423     | 2                  |

```
## 29          C.paca          272      1916          2
```

Here one event was defined as a sequence of consecutive photographs from a single camera. For most species each event recorded a single individual, but in some species pairs or small groups could be capture in a single event.

The RN model uses data from detection history matrix, where each row represents a “site” (camera location) and each column represents a time unit or “visit”. This means we need to divide the period of camera activity into time units of fixed duration. Each entry in the matrix consist of a 0 for non-detection or a 1 for detection (or empty values if the camera was not active during a giving time unit).

This format of detection histories does do not use information on the number of individuals per detection event, or number of independent detections events per time units (for example two events in following days within a time unit count as a single detection).

Thus the effective number of detections for modeling species anundance will depend on how these events are distributed among different cameras and time units.

## Species with few effective detections

Fitted models for species with only two effective detections among the 54 camara traps selected for the analysis showed clear signs of lack of fit: \* MacKenzie and Bailey Goodness-of-fit Test with p-values <0.05, \* estimate of c-hat (overdispersion) » 1 \* large or very large values in coefficients estimates

```
tbl1 %>% filter(n.detect<5) %>% select(1:5)
```

| ##   | species        | n.detect | chi.square | p.value | c.hat.est  |
|------|----------------|----------|------------|---------|------------|
| ## 1 | C.unicinctus   | 2        | 164.850705 | 0.0212  | 6.3495930  |
| ## 2 | D.marsupialis  | 2        | 14.869533  | 0.3859  | 0.9202898  |
| ## 3 | H.hydrochaeris | 2        | 16.880230  | 0.0684  | 4.5178344  |
| ## 4 | L.wiedii       | 2        | 27.117515  | 0.3138  | 1.1922936  |
| ## 5 | O.virginianus  | 2        | 29.868537  | 0.2262  | 1.4201888  |
| ## 6 | P.tajacu       | 2        | 47.969248  | 0.0062  | 14.4928694 |
| ## 7 | T.pecari       | 2        | 7.803391   | 0.4498  | 0.9334348  |

Species with 5 to 10 effective detections among the 54 camara traps performed better on the Goodness of fit test, but still had problems with very large or unrealistic values in coefficients estimates, and were also discarded.

```
tbl1 %>% filter(n.detect>=5 & n.detect <10) %>% select(1:5)
```

| ##   | species        | n.detect | chi.square | p.value | c.hat.est |
|------|----------------|----------|------------|---------|-----------|
| ## 1 | C.olivaceus    | 7        | 268.68752  | 0.1137  | 1.9639307 |
| ## 2 | N.nasua        | 5        | 154.40128  | 0.2162  | 1.2860354 |
| ## 3 | P.concolor     | 9        | 184.96443  | 0.1000  | 1.8972678 |
| ## 4 | P.jacquacu     | 6        | 130.10821  | 0.3483  | 1.0667008 |
| ## 5 | P.maximus      | 6        | 63.55353   | 0.6537  | 0.3748963 |
| ## 6 | T.terrestris   | 8        | 164.60607  | 0.5368  | 0.5499967 |
| ## 7 | T.tetradactyla | 5        | 128.92489  | 0.2194  | 1.1707677 |

So we focus the analysis on 15 species with at least 11 effective detections.

## Results for each species

### D.imperfecta

No sign of lack of fit, c-hat values less than 1

```
spp <- "D.imperfecta"
mod <- ifelse(spp %in% with.quad.term,"03","01")
```

```
tbl1 %>% filter(species %in% spp) %>% select(1:5)
```

```
##           species n.detect chi.square p.value c.hat.est  
## 1 D.imperfecta      11   292.1195  0.4206  0.570783
```

Most support for variables:

```
sw(get(sprintf("oms%s.%s",mod,spp)))
```

```
##           p(dras) p(sfrz) lam(tree_1000m) lam(dcon) lam(drios)  
## Sum of weights:  0.96   0.45   0.38           0.24   0.24  
## N containing models: 32    32    32           32    32  
##           p(date)  
## Sum of weights:  0.23  
## N containing models: 32
```

Summary of model averaging estimates (use conditional average):

```
summary(get(sprintf("mavg%s.%s",mod,spp)))
```

```
##  
## Call:  
## model.avg(object = get.models(object = oms01, subset = delta <  
##    10))  
##  
## Component model call:  
## occuRN(formula = ~<48 unique rhs>, data = UMF, K = 50)  
##  
## Component models:  
##      df logLik  AICc delta weight  
## 5      3 -35.76 78.00  0.00  0.14  
## 56     4 -34.71 78.23  0.23  0.13  
## 35     4 -35.03 78.87  0.88  0.09  
## 356    5 -34.06 79.38  1.38  0.07  
## 25     4 -35.69 80.20  2.20  0.05  
## 15     4 -35.75 80.32  2.32  0.04  
## 45     4 -35.75 80.32  2.33  0.04  
## 256    5 -34.64 80.53  2.53  0.04  
## 156    5 -34.70 80.66  2.66  0.04  
## 456    5 -34.70 80.66  2.66  0.04  
## 135    5 -34.89 81.02  3.03  0.03  
## 235    5 -35.00 81.24  3.25  0.03  
## 345    5 -35.03 81.30  3.31  0.03  
## 1356   6 -33.92 81.62  3.62  0.02  
## 2356   6 -34.03 81.84  3.85  0.02  
## 3456   6 -34.06 81.91  3.92  0.02  
## 125    5 -35.66 82.58  4.58  0.01  
## 245    5 -35.69 82.63  4.63  0.01  
## 145    5 -35.75 82.74  4.74  0.01  
## 1256   6 -34.62 83.02  5.03  0.01  
## 2456   6 -34.64 83.07  5.07  0.01  
## 1456   6 -34.70 83.19  5.19  0.01  
## 1235   6 -34.88 83.55  5.55  0.01  
## 1345   6 -34.89 83.56  5.56  0.01  
## 2345   6 -34.99 83.78  5.78  0.01  
## 12356  7 -33.91 84.26  6.26  0.01
```

```

## 13456 7 -33.91 84.26 6.27 0.01
## (Null) 2 -40.02 84.27 6.28 0.01
## 23456 7 -34.03 84.49 6.50 0.01
## 6 3 -39.04 84.56 6.56 0.01
## 3 3 -39.27 85.02 7.02 0.00
## 1245 6 -35.66 85.11 7.12 0.00
## 36 4 -38.31 85.44 7.44 0.00
## 12456 7 -34.62 85.67 7.67 0.00
## 12345 7 -34.88 86.20 8.20 0.00
## 4 3 -39.91 86.30 8.30 0.00
## 1 3 -39.92 86.32 8.32 0.00
## 2 3 -40.02 86.52 8.52 0.00
## 46 4 -38.91 86.63 8.63 0.00
## 16 4 -38.95 86.71 8.72 0.00
## 26 4 -39.03 86.88 8.89 0.00
## 123456 8 -33.91 87.02 9.02 0.00
## 34 4 -39.13 87.07 9.07 0.00
## 13 4 -39.26 87.35 9.35 0.00
## 23 4 -39.27 87.35 9.36 0.00
## 346 5 -38.14 87.54 9.54 0.00
## 136 5 -38.30 87.86 9.86 0.00
## 236 5 -38.31 87.87 9.87 0.00
##
## Term codes:
##      lam(dcon)      lam(drios) lam(tree_1000m)      p(date)      p(dras)
##      1          2          3          4          5
##      p(sfrz)
##      6
##
## Model-averaged coefficients:
## (full average)
##      Estimate Std. Error z value Pr(>|z|)
## lam(Int)      -1.017970  0.706150  1.442  0.1494
## p(Int)        -3.774553  1.529065  2.469  0.0136 *
## p(dras)       1.403994  0.589514  2.382  0.0172 *
## p(sfrz)       0.858206  1.370132  0.626  0.5311
## lam(tree_1000m) 0.213528  0.406591  0.525  0.5995
## lam(drios)    0.039905  0.271496  0.147  0.8831
## lam(dcon)     0.031842  0.480174  0.066  0.9471
## p(date)       0.007073  0.360610  0.020  0.9844
##
## (conditional average)
##      Estimate Std. Error z value Pr(>|z|)
## lam(Int)      -1.01797  0.70615  1.442  0.14942
## p(Int)        -3.77455  1.52906  2.469  0.01357 *
## p(dras)       1.46005  0.52873  2.761  0.00575 **
## p(sfrz)       1.90910  1.47301  1.296  0.19496
## lam(tree_1000m) 0.56882  0.48815  1.165  0.24392
## lam(drios)    0.17160  0.54256  0.316  0.75179
## lam(dcon)     0.13633  0.98637  0.138  0.89007
## p(date)       0.03153  0.76087  0.041  0.96695
## ---
## Signif. codes:  0 '***' 0.001 '**' 0.01 '*' 0.05 '.' 0.1 ' ' 1

```

```

ss <- match(rownames(get(sprintf("UMF.%s", spp))@y), cam.data$cdg)
prd <- predict(get(sprintf("mavg%s.%s", mod, spp)), type='state')
dtf <- data.frame(fit=prd$fit, se.fit=prd$se.fit, hunting=cam.data[ss, "hunting"], dcon=cam.data[ss, "dcon"])
ggplot(dtf, aes(y=dcon, x=tree_1000m, size=fit, colour=se.fit)) +
  geom_point() + ylab("Distance to conucos (m)") + xlab("Tree cover (% in 1km buffer)") +
  labs(title=spp, size='Predicted values', colour='Prediction S.E.')

```

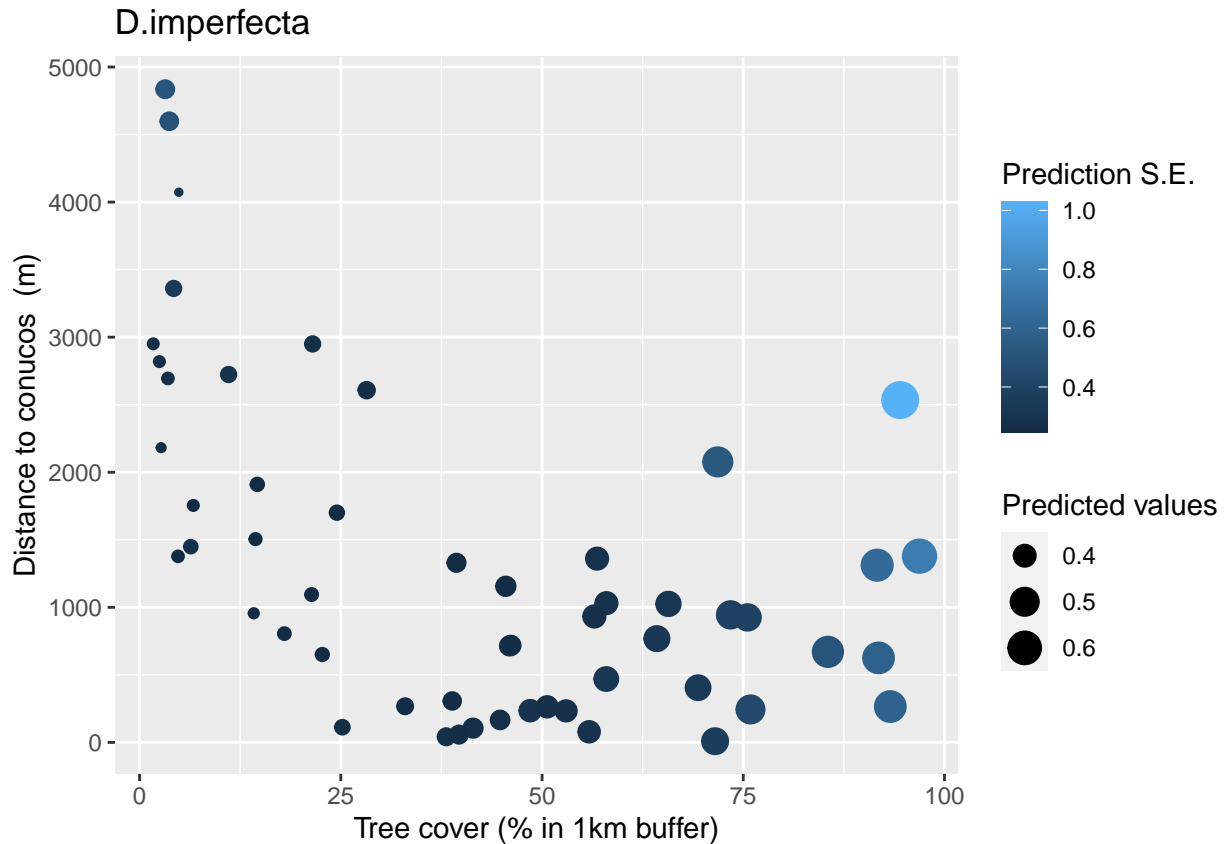

### P.onca

No sign of lack of fit, c-hat values less than 1

```

spp <- "P.onca"
mod <- ifelse(spp %in% with.quad.term, "03", "01")

tbl1 %>% filter(species %in% spp) %>% select(1:5)

```

```

## species n.detect chi.square p.value c.hat.est
## 1 P.onca      12  427.2777  0.35 0.8463562

```

Most support for variables:

```
sw(get(sprintf("oms%s.%s", mod, spp)))
```

```

##          lam(tree_1000m) lam(drios) lam(dcon) p(dras) p(date)
## Sum of weights:      0.68         0.30      0.26    0.25    0.24
## N containing models:   32          32       32     32     32
##          p(sfrz)
## Sum of weights:      0.23

```

```
## N containing models: 32
```

```
Summary of model averaging estimates (use conditional average):
```

```
summary(get(sprintf("mavg%s.%s",mod,spp)))
```

```
##
```

```
## Call:
```

```
## model.avg(object = get.models(object = oms01, subset = delta <  
## 10))
```

```
##
```

```
## Component model call:
```

```
## occuRN(formula = ~<61 unique rhs>, data = UMF, K = 50)
```

```
##
```

```
## Component models:
```

| ##        | df | logLik | AICc   | delta | weight |
|-----------|----|--------|--------|-------|--------|
| ## 3      | 3  | -46.01 | 98.49  | 0.00  | 0.16   |
| ## (Null) | 2  | -47.95 | 100.13 | 1.64  | 0.07   |
| ## 23     | 4  | -45.69 | 100.20 | 1.71  | 0.07   |
| ## 13     | 4  | -45.92 | 100.66 | 2.17  | 0.05   |
| ## 36     | 4  | -45.98 | 100.78 | 2.29  | 0.05   |
| ## 34     | 4  | -46.00 | 100.81 | 2.32  | 0.05   |
| ## 35     | 4  | -46.01 | 100.83 | 2.34  | 0.05   |
| ## 2      | 3  | -47.72 | 101.92 | 3.43  | 0.03   |
| ## 1      | 3  | -47.80 | 102.07 | 3.58  | 0.03   |
| ## 4      | 3  | -47.91 | 102.30 | 3.81  | 0.02   |
| ## 235    | 5  | -45.52 | 102.30 | 3.81  | 0.02   |
| ## 6      | 3  | -47.93 | 102.35 | 3.86  | 0.02   |
| ## 5      | 3  | -47.94 | 102.37 | 3.88  | 0.02   |
| ## 135    | 5  | -45.62 | 102.49 | 4.00  | 0.02   |
| ## 236    | 5  | -45.67 | 102.58 | 4.09  | 0.02   |
| ## 123    | 5  | -45.69 | 102.64 | 4.15  | 0.02   |
| ## 234    | 5  | -45.69 | 102.64 | 4.15  | 0.02   |
| ## 136    | 5  | -45.90 | 103.05 | 4.56  | 0.02   |
| ## 12     | 4  | -47.13 | 103.07 | 4.58  | 0.02   |
| ## 134    | 5  | -45.92 | 103.10 | 4.61  | 0.02   |
| ## 346    | 5  | -45.98 | 103.20 | 4.71  | 0.01   |
| ## 356    | 5  | -45.98 | 103.21 | 4.72  | 0.01   |
| ## 345    | 5  | -46.00 | 103.24 | 4.75  | 0.01   |
| ## 25     | 4  | -47.43 | 103.68 | 5.19  | 0.01   |
| ## 26     | 4  | -47.70 | 104.22 | 5.73  | 0.01   |
| ## 24     | 4  | -47.71 | 104.24 | 5.75  | 0.01   |
| ## 2345   | 6  | -45.24 | 104.27 | 5.78  | 0.01   |
| ## 14     | 4  | -47.73 | 104.28 | 5.79  | 0.01   |
| ## 15     | 4  | -47.77 | 104.36 | 5.87  | 0.01   |
| ## 16     | 4  | -47.78 | 104.38 | 5.89  | 0.01   |
| ## 1345   | 6  | -45.37 | 104.53 | 6.04  | 0.01   |
| ## 1235   | 6  | -45.38 | 104.54 | 6.05  | 0.01   |
| ## 45     | 4  | -47.88 | 104.57 | 6.08  | 0.01   |
| ## 46     | 4  | -47.90 | 104.62 | 6.13  | 0.01   |
| ## 56     | 4  | -47.93 | 104.68 | 6.19  | 0.01   |
| ## 2356   | 6  | -45.50 | 104.79 | 6.30  | 0.01   |
| ## 1356   | 6  | -45.61 | 105.01 | 6.52  | 0.01   |
| ## 1236   | 6  | -45.66 | 105.12 | 6.63  | 0.01   |
| ## 2346   | 6  | -45.67 | 105.12 | 6.63  | 0.01   |

```

## 1234    6 -45.69 105.17  6.68  0.01
## 124     5 -47.09 105.42  6.93  0.00
## 126     5 -47.10 105.46  6.97  0.00
## 125     5 -47.13 105.50  7.01  0.00
## 245     5 -47.13 105.52  7.03  0.00
## 1346    6 -45.90 105.59  7.10  0.00
## 3456    6 -45.98 105.74  7.25  0.00
## 256     5 -47.42 106.09  7.59  0.00
## 246     5 -47.69 106.64  8.15  0.00
## 12345   7 -45.11 106.66  8.17  0.00
## 146     5 -47.73 106.70  8.21  0.00
## 156     5 -47.76 106.77  8.28  0.00
## 23456   7 -45.24 106.91  8.42  0.00
## 456     5 -47.88 107.00  8.51  0.00
## 145     5 -47.88 107.00  8.51  0.00
## 12356   7 -45.36 107.15  8.66  0.00
## 13456   7 -45.37 107.17  8.68  0.00
## 12346   7 -45.66 107.76  9.27  0.00
## 1245    6 -47.01 107.80  9.31  0.00
## 1246    6 -47.07 107.93  9.44  0.00
## 1256    6 -47.10 107.99  9.50  0.00
## 2456    6 -47.13 108.05  9.56  0.00
##
## Term codes:
##      lam(dcon)      lam(drios) lam(tree_1000m)      p(date)      p(dras)
##      1              2              3              4              5
##      p(sfrz)
##      6
##
## Model-averaged coefficients:
## (full average)
##      Estimate Std. Error z value Pr(>|z|)
## lam(Int)      -0.99764   0.79362  1.257  0.2087
## lam(tree_1000m) 0.47426   0.45323  1.046  0.2954
## p(Int)        -2.20945   0.87014  2.539  0.0111 *
## lam(drios)     0.10587   0.27774  0.381  0.7031
## lam(dcon)      0.01726   0.43754  0.039  0.9685
## p(sfrz)       -0.04615   0.49514  0.093  0.9257
## p(date)        0.03551   0.29318  0.121  0.9036
## p(dras)        0.18217   0.70451  0.259  0.7960
##
## (conditional average)
##      Estimate Std. Error z value Pr(>|z|)
## lam(Int)      -0.99764   0.79362  1.257  0.2087
## lam(tree_1000m) 0.70196   0.37974  1.849  0.0645 .
## p(Int)        -2.20945   0.87014  2.539  0.0111 *
## lam(drios)     0.35070   0.41191  0.851  0.3945
## lam(dcon)      0.06549   0.85053  0.077  0.9386
## p(sfrz)       -0.19815   1.01123  0.196  0.8447
## p(date)        0.14956   0.58732  0.255  0.7990
## p(dras)        0.71939   1.25442  0.573  0.5663
## ---
## Signif. codes:  0 '***' 0.001 '**' 0.01 '*' 0.05 '.' 0.1 ' ' 1

```

```

ss <- match(rownames(get(sprintf("UMF.%s", spp))@y), cam.data$cdg)
prd <- predict(get(sprintf("mavg%s.%s", mod, spp)), type='state')
dtf <- data.frame(fit=prd$fit, se.fit=prd$se.fit, hunting=cam.data[ss,"hunting"], dcon=cam.data[ss,"dcon"])
ggplot(dtf, aes(y=dcon, x=tree_1000m, size=fit, colour=se.fit)) +
  geom_point() + ylab("Distance to conucos (m)") + xlab("Tree cover (% in 1km buffer)") +
  labs(title=spp, size='Predicted values', colour='Prediction S.E.')

```

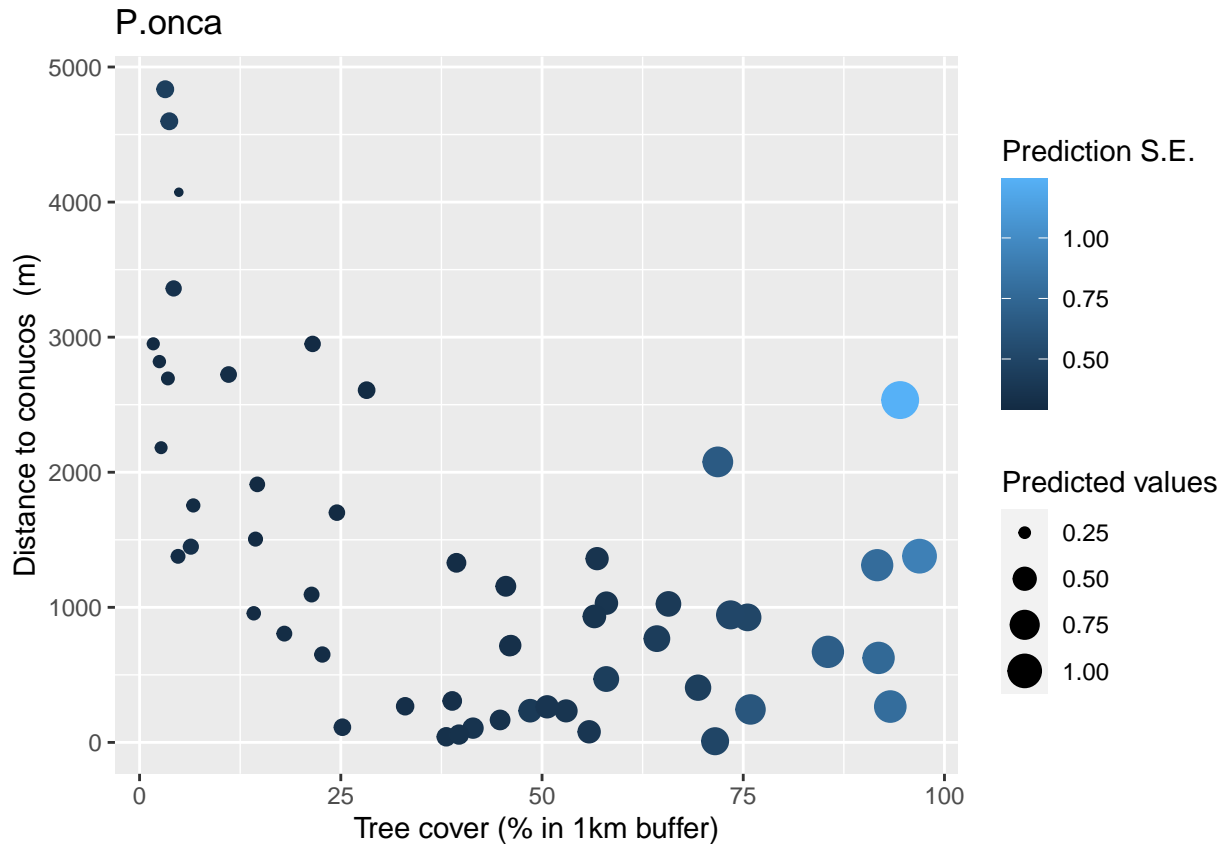

### M.tridactyla

No sign of lack of fit, c-hat values less than 1

```

spp <- "M.tridactyla"
mod <- ifelse(spp %in% with.quad.term, "03", "01")

tbl1 %>% filter(species %in% spp) %>% select(1:5)

```

```

##           species n.detect chi.square p.value c.hat.est
## 1 M.tridactyla      13    413.1652 0.3151 0.8339423

```

Most support for variables:

```

sw(get(sprintf("oms%s.%s", mod, spp)))

```

```

##           lam(drios) p(dras) p(sfrz) lam(dcon) lam(tree_1000m)
## Sum of weights:    0.89    0.60    0.48    0.38    0.35
## N containing models: 32      32      32      32      32
##           p(date)
## Sum of weights:    0.23

```



```
## N containing models: 32
```

```
Summary of model averaging estimates (use conditional average):
```

```
summary(get(sprintf("mavg%s.%s",mod,spp)))
```

```
##
```

```
## Call:
```

```
## model.avg(object = get.models(object = oms01, subset = delta <  
## 10))
```

```
##
```

```
## Component model call:
```

```
## occuRN(formula = ~<61 unique rhs>, data = UMF, K = 50)
```

```
##
```

```
## Component models:
```

| ##        | df | logLik | AICc   | delta | weight |
|-----------|----|--------|--------|-------|--------|
| ## 25     | 4  | -47.79 | 104.41 | 0.00  | 0.09   |
| ## 256    | 5  | -46.61 | 104.47 | 0.06  | 0.09   |
| ## 125    | 5  | -46.93 | 105.11 | 0.70  | 0.06   |
| ## 1256   | 6  | -45.67 | 105.12 | 0.72  | 0.06   |
| ## 235    | 5  | -47.02 | 105.30 | 0.89  | 0.06   |
| ## 2356   | 6  | -45.83 | 105.45 | 1.04  | 0.05   |
| ## 12     | 4  | -48.42 | 105.66 | 1.26  | 0.05   |
| ## 126    | 5  | -47.40 | 106.04 | 1.64  | 0.04   |
| ## 2      | 3  | -49.85 | 106.18 | 1.78  | 0.04   |
| ## 23     | 4  | -48.70 | 106.22 | 1.81  | 0.04   |
| ## 26     | 4  | -48.84 | 106.49 | 2.08  | 0.03   |
| ## 236    | 5  | -47.63 | 106.52 | 2.11  | 0.03   |
| ## 245    | 5  | -47.76 | 106.76 | 2.36  | 0.03   |
| ## 2456   | 6  | -46.59 | 106.97 | 2.56  | 0.02   |
| ## 1235   | 6  | -46.81 | 107.42 | 3.01  | 0.02   |
| ## 12356  | 7  | -45.58 | 107.60 | 3.19  | 0.02   |
| ## 1245   | 6  | -46.93 | 107.65 | 3.24  | 0.02   |
| ## 123    | 5  | -48.25 | 107.75 | 3.35  | 0.02   |
| ## 12456  | 7  | -45.66 | 107.76 | 3.36  | 0.02   |
| ## 2345   | 6  | -47.01 | 107.80 | 3.40  | 0.02   |
| ## 124    | 5  | -48.41 | 108.08 | 3.67  | 0.01   |
| ## 23456  | 7  | -45.83 | 108.09 | 3.68  | 0.01   |
| ## 6      | 3  | -50.83 | 108.14 | 3.73  | 0.01   |
| ## 1236   | 6  | -47.21 | 108.21 | 3.81  | 0.01   |
| ## 24     | 4  | -49.71 | 108.23 | 3.83  | 0.01   |
| ## 234    | 5  | -48.60 | 108.45 | 4.04  | 0.01   |
| ## (Null) | 2  | -52.11 | 108.46 | 4.05  | 0.01   |
| ## 1246   | 6  | -47.40 | 108.58 | 4.17  | 0.01   |
| ## 246    | 5  | -48.73 | 108.71 | 4.31  | 0.01   |
| ## 2346   | 6  | -47.57 | 108.92 | 4.52  | 0.01   |
| ## 36     | 4  | -50.18 | 109.17 | 4.76  | 0.01   |
| ## 3      | 3  | -51.41 | 109.30 | 4.90  | 0.01   |
| ## 56     | 4  | -50.36 | 109.53 | 5.13  | 0.01   |
| ## 5      | 3  | -51.64 | 109.77 | 5.36  | 0.01   |
| ## 12345  | 7  | -46.81 | 110.06 | 5.65  | 0.01   |
| ## 1234   | 6  | -48.23 | 110.24 | 5.84  | 0.00   |
| ## 123456 | 8  | -45.58 | 110.36 | 5.95  | 0.00   |
| ## 16     | 4  | -50.80 | 110.41 | 6.01  | 0.00   |
| ## 46     | 4  | -50.82 | 110.45 | 6.05  | 0.00   |

```

## 1      3 -52.09 110.66  6.25  0.00
## 4      3 -52.11 110.70  6.30  0.00
## 12346  7 -47.21 110.85  6.44  0.00
## 356    5 -49.82 110.88  6.48  0.00
## 35     4 -51.04 110.89  6.48  0.00
## 136    5 -49.98 111.21  6.80  0.00
## 13     4 -51.20 111.22  6.81  0.00
## 346    5 -50.17 111.59  7.18  0.00
## 34     4 -51.41 111.64  7.23  0.00
## 456    5 -50.31 111.87  7.46  0.00
## 156    5 -50.36 111.97  7.56  0.00
## 45     4 -51.62 112.06  7.65  0.00
## 15     4 -51.64 112.10  7.70  0.00
## 135    5 -50.63 112.52  8.11  0.00
## 1356   6 -49.46 112.71  8.31  0.00
## 146    5 -50.78 112.81  8.40  0.00
## 14     4 -52.08 112.98  8.58  0.00
## 345    5 -51.02 113.29  8.88  0.00
## 3456   6 -49.77 113.33  8.93  0.00
## 134    5 -51.18 113.62  9.21  0.00
## 1346   6 -49.98 113.74  9.33  0.00
## 1456   6 -50.31 114.40 10.00  0.00
##
## Term codes:
##      lam(dcon)      lam(drios) lam(tree_1000m)      p(date)      p(dras)
##      1              2              3              4              5
##      p(sfrz)
##      6
##
## Model-averaged coefficients:
## (full average)
##      Estimate Std. Error z value Pr(>|z|)
## lam(Int)      1.52015   1.27708   1.190 0.233916
## lam(drios)    0.88469   0.49283   1.795 0.072631 .
## p(Int)       -5.67069   1.63013   3.479 0.000504 ***
## p(dras)       0.46155   0.50749   0.909 0.363100
## p(sfrz)       0.81718   1.22249   0.668 0.503844
## lam(dcon)    -0.24026   0.49004   0.490 0.623938
## lam(tree_1000m) 0.11231   0.24279   0.463 0.643657
## p(date)      -0.01886   0.25354   0.074 0.940715
##
## (conditional average)
##      Estimate Std. Error z value Pr(>|z|)
## lam(Int)      1.52015   1.27708   1.190 0.233916
## lam(drios)    0.98891   0.41040   2.410 0.015970 *
## p(Int)       -5.67069   1.63013   3.479 0.000504 ***
## p(dras)       0.76738   0.43991   1.744 0.081089 .
## p(sfrz)       1.70479   1.26672   1.346 0.178356
## lam(dcon)    -0.63409   0.61973   1.023 0.306221
## lam(tree_1000m) 0.32008   0.31858   1.005 0.315041
## p(date)      -0.08327   0.52773   0.158 0.874628
## ---
## Signif. codes:  0 '***' 0.001 '**' 0.01 '*' 0.05 '.' 0.1 ' ' 1

```

```

ss <- match(rownames(get(sprintf("UMF.%s", spp))@y), cam.data$cdg)
prd <- predict(get(sprintf("mavg%s.%s", mod, spp)), type='state')
dtf <- data.frame(fit=prd$fit, se.fit=prd$se.fit, hunting=cam.data[ss,"hunting"], dcon=cam.data[ss,"dcon"])
ggplot(dtf, aes(y=dcon, x=tree_1000m, size=fit, colour=se.fit)) +
  geom_point() + ylab("Distance to conucos (m)") + xlab("Tree cover (% in 1km buffer)") +
  labs(title=spp, size='Predicted values', colour='Prediction S.E.')

```

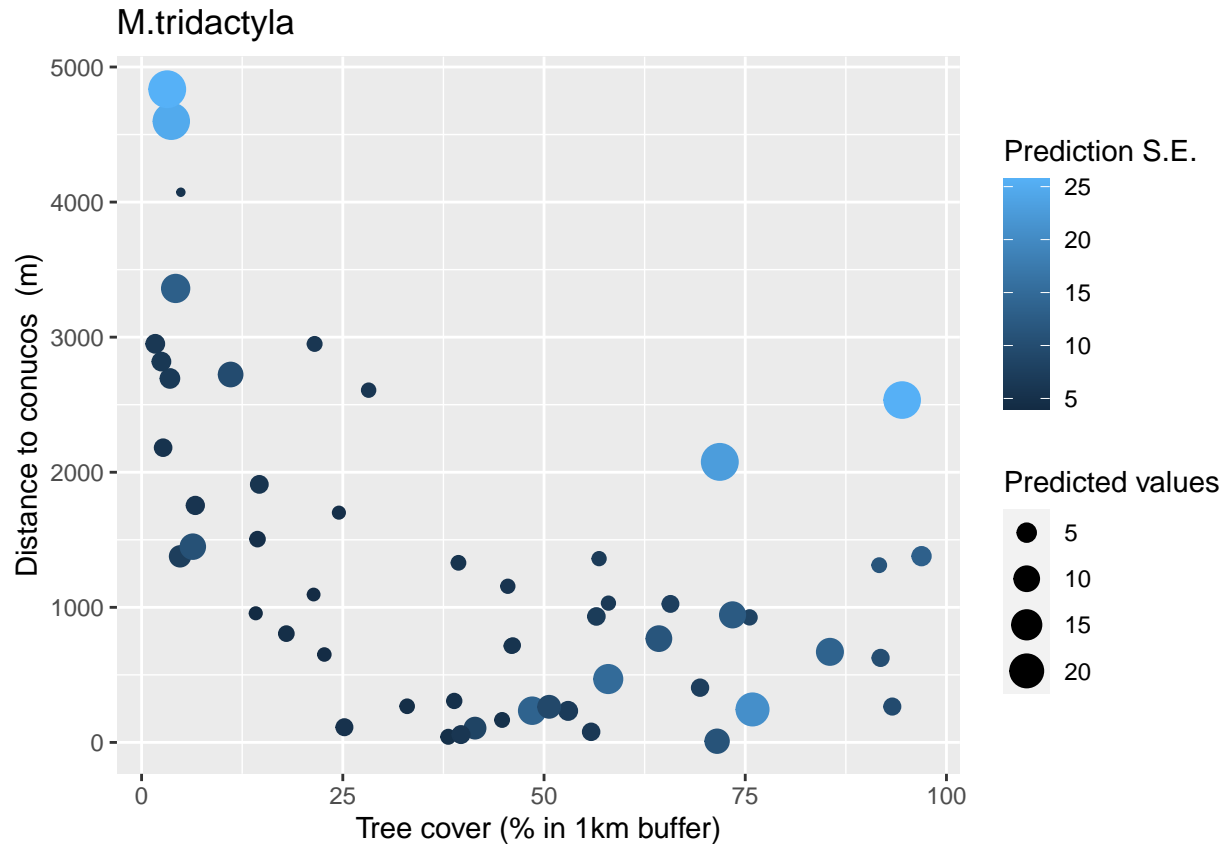

### L.pardalis

No sign of lack of fit,  $c\text{-hat} > 1$  overdispersion (used to adjust standard errors)

```

spp <- "L.pardalis"
mod <- ifelse(spp %in% with.quad.term, "03", "01")

tbl1 %>% filter(species %in% spp) %>% select(1:5)

```

```

##      species n.detect chi.square p.value c.hat.est
## 1 L.pardalis      14  1427.131  0.1279  1.773193

```

Most support for variables:

```
sw(get(sprintf("oms%s.%s", mod, spp)))
```

```

##          lam(tree_1000m) lam(drios) lam(dcon) p(dras) p(sfrz)
## Sum of weights:      0.35      0.26      0.26      0.25      0.24
## N containing models:    32      32      32      32      32
##          p(date)
## Sum of weights:      0.23

```

```
## N containing models: 32
```

```
Summary of model averaging estimates (use conditional average):
```

```
summary(get(sprintf("mavg%s.%s",mod,spp)))
```

```
##
```

```
## Call:
```

```
## model.avg(object = get.models(object = oms01, subset = delta <  
## 10))
```

```
##
```

```
## Component model call:
```

```
## occuRN(formula = ~<57 unique rhs>, data = UMF, K = 50)
```

```
##
```

```
## Component models:
```

| ##        | df | logLik | QAICc | delta | weight |
|-----------|----|--------|-------|-------|--------|
| ## (Null) | 2  | -52.56 | 65.76 | 0.00  | 0.14   |
| ## 3      | 3  | -51.37 | 66.76 | 0.99  | 0.09   |
| ## 1      | 3  | -52.01 | 67.48 | 1.71  | 0.06   |
| ## 2      | 3  | -52.11 | 67.59 | 1.83  | 0.06   |
| ## 5      | 3  | -52.31 | 67.81 | 2.05  | 0.05   |
| ## 6      | 3  | -52.37 | 67.88 | 2.12  | 0.05   |
| ## 4      | 3  | -52.56 | 68.10 | 2.34  | 0.04   |
| ## 23     | 4  | -51.00 | 68.78 | 3.01  | 0.03   |
| ## 35     | 4  | -51.17 | 68.96 | 3.20  | 0.03   |
| ## 36     | 4  | -51.20 | 69.00 | 3.24  | 0.03   |
| ## 13     | 4  | -51.28 | 69.08 | 3.32  | 0.03   |
| ## 34     | 4  | -51.37 | 69.19 | 3.42  | 0.03   |
| ## 16     | 4  | -51.82 | 69.70 | 3.94  | 0.02   |
| ## 15     | 4  | -51.87 | 69.75 | 3.99  | 0.02   |
| ## 12     | 4  | -51.87 | 69.76 | 3.99  | 0.02   |
| ## 26     | 4  | -51.88 | 69.77 | 4.00  | 0.02   |
| ## 25     | 4  | -51.96 | 69.85 | 4.09  | 0.02   |
| ## 14     | 4  | -52.00 | 69.90 | 4.14  | 0.02   |
| ## 24     | 4  | -52.10 | 70.01 | 4.25  | 0.02   |
| ## 56     | 4  | -52.12 | 70.04 | 4.28  | 0.02   |
| ## 45     | 4  | -52.30 | 70.24 | 4.47  | 0.02   |
| ## 46     | 4  | -52.37 | 70.32 | 4.55  | 0.01   |
| ## 236    | 5  | -50.81 | 71.10 | 5.33  | 0.01   |
| ## 235    | 5  | -50.87 | 71.16 | 5.40  | 0.01   |
| ## 123    | 5  | -51.00 | 71.31 | 5.55  | 0.01   |
| ## 234    | 5  | -51.00 | 71.31 | 5.55  | 0.01   |
| ## 356    | 5  | -51.01 | 71.32 | 5.55  | 0.01   |
| ## 136    | 5  | -51.11 | 71.44 | 5.67  | 0.01   |
| ## 135    | 5  | -51.11 | 71.44 | 5.67  | 0.01   |
| ## 345    | 5  | -51.17 | 71.50 | 5.74  | 0.01   |
| ## 346    | 5  | -51.20 | 71.54 | 5.77  | 0.01   |
| ## 134    | 5  | -51.28 | 71.62 | 5.86  | 0.01   |
| ## 126    | 5  | -51.67 | 72.06 | 6.30  | 0.01   |
| ## 156    | 5  | -51.69 | 72.09 | 6.32  | 0.01   |
| ## 256    | 5  | -51.74 | 72.15 | 6.39  | 0.01   |
| ## 125    | 5  | -51.75 | 72.16 | 6.40  | 0.01   |
| ## 146    | 5  | -51.80 | 72.21 | 6.45  | 0.01   |
| ## 145    | 5  | -51.84 | 72.26 | 6.50  | 0.01   |
| ## 246    | 5  | -51.86 | 72.28 | 6.52  | 0.01   |

```

## 124      5 -51.86 72.28  6.52  0.01
## 245      5 -51.93 72.36  6.60  0.01
## 456      5 -52.10 72.55  6.79  0.00
## 2356     6 -50.69 73.61  7.84  0.00
## 2346     6 -50.81 73.74  7.98  0.00
## 1236     6 -50.81 73.74  7.98  0.00
## 2345     6 -50.86 73.80  8.04  0.00
## 1235     6 -50.87 73.81  8.04  0.00
## 1356     6 -50.95 73.91  8.14  0.00
## 3456     6 -51.00 73.96  8.19  0.00
## 1234     6 -51.00 73.96  8.20  0.00
## 1345     6 -51.11 74.08  8.32  0.00
## 1346     6 -51.11 74.08  8.32  0.00
## 1256     6 -51.56 74.59  8.83  0.00
## 1456     6 -51.64 74.68  8.92  0.00
## 1246     6 -51.64 74.68  8.92  0.00
## 2456     6 -51.70 74.75  8.99  0.00
## 1245     6 -51.73 74.78  9.01  0.00
##
## Term codes:
##      lam(dcon)      lam(drios) lam(tree_1000m)      p(date)      p(dras)
##          1              2              3              4              5
##      p(sfrz)
##          6
##
## Model-averaged coefficients:
## (full average)
##      Estimate Std. Error z value Pr(>|z|)
## lam(Int)      -0.861792  0.674129  1.278  0.20112
## p(Int)        -2.336286  0.836814  2.792  0.00524 **
## lam(tree_1000m) 0.171864  0.314199  0.547  0.58438
## lam(dcon)     -0.126765  0.431781  0.294  0.76907
## lam(drios)    -0.093753  0.284728  0.329  0.74195
## p(dras)       0.065857  0.242115  0.272  0.78562
## p(sfrz)       0.146831  0.563360  0.261  0.79437
## p(date)      0.008511  0.258035  0.033  0.97369
##
## (conditional average)
##      Estimate Std. Error z value Pr(>|z|)
## lam(Int)      -0.86179  0.67413  1.278  0.20112
## p(Int)        -2.33629  0.83681  2.792  0.00524 **
## lam(tree_1000m) 0.49957  0.35106  1.423  0.15473
## lam(dcon)     -0.49407  0.73835  0.669  0.50340
## lam(drios)    -0.36103  0.46443  0.777  0.43694
## p(dras)       0.27137  0.43102  0.630  0.52895
## p(sfrz)       0.60641  1.01590  0.597  0.55056
## p(date)      0.03808  0.54477  0.070  0.94427
## ---
## Signif. codes:  0 '***' 0.001 '**' 0.01 '*' 0.05 '.' 0.1 ' ' 1

```

```

ss <- match(rownames(get(sprintf("UMF.%s", spp))@y), cam.data$cdg)
prd <- predict(get(sprintf("mavg%s.%s", mod, spp)), type='state')
dtf <- data.frame(fit=prd$fit, se.fit=prd$se.fit, hunting=cam.data[ss, "hunting"], dcon=cam.data[ss, "dcon"])
ggplot(dtf, aes(y=dcon, x=tree_1000m, size=fit, colour=se.fit)) +

```

```
geom_point() + ylab("Distance to conucos (m)") + xlab("Tree cover (% in 1km buffer)") +
labs(title=spp,size='Predicted values',colour='Prediction S.E.')
```

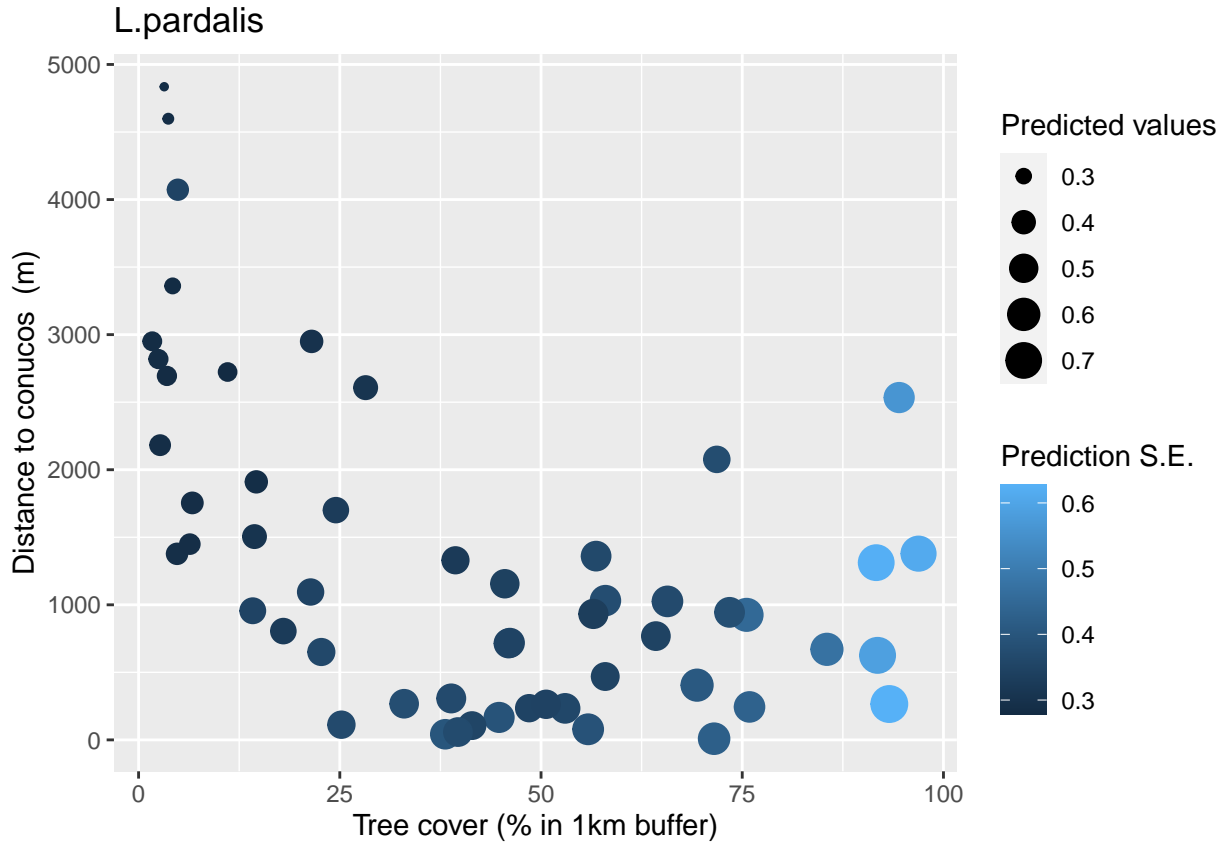

### E.barbara

No sign of lack of fit,  $c\text{-hat} < 1$  : But prediction unrealistic (too high)

```
spp <- "E.barbara"
mod <- ifelse(spp %in% with.quad.term,"03","01")

tbl1 %>% filter(species %in% spp) %>% select(1:5)
```

```
## species n.detect chi.square p.value c.hat.est
## 1 E.barbara 16 282.1365 0.6953 0.4064038
```

Most support for variables:

```
sw(get(sprintf("oms%s.%s",mod,spp)))
```

```
## lam(tree_1000m) lam(dcon) p(sfrz) lam(drios)
## Sum of weights: 0.87 0.84 0.24 0.24
## N containing models: 64 48 48 48
## lam(I(tree_1000m^2)) p(date) p(dras)
## Sum of weights: 0.23 0.23 0.22
## N containing models: 32 48 48
```

Summary of model averaging estimates (use conditional average):

```
summary(get(sprintf("mavg%s.%s",mod,spp)))
```

```
##  
## Call:  
## model.avg(object = get.models(object = oms03, subset = delta <  
##      10))  
##  
## Component model call:  
## occuRN(formula = ~<64 unique rhs>, data = UMF, K = 50)  
##  
## Component models:  
##      df logLik  AICc delta weight  
## 14      4 -52.76 114.34 0.00  0.19  
## 147     5 -52.66 116.58 2.24  0.06  
## 134     5 -52.67 116.59 2.25  0.06  
## 145     5 -52.75 116.75 2.42  0.06  
## 124     5 -52.75 116.75 2.42  0.06  
## 146     5 -52.76 116.77 2.43  0.06  
## 1       3 -55.46 117.40 3.06  0.04  
## 4       3 -55.90 118.28 3.94  0.03  
## 34      4 -55.05 118.92 4.58  0.02  
## 1347    6 -52.58 118.94 4.61  0.02  
## 1234    6 -52.62 119.02 4.69  0.02  
## 1457    6 -52.65 119.08 4.75  0.02  
## 1345    6 -52.65 119.09 4.75  0.02  
## 1247    6 -52.65 119.10 4.76  0.02  
## 1467    6 -52.66 119.12 4.78  0.02  
## 1346    6 -52.67 119.12 4.79  0.02  
## 1245    6 -52.74 119.28 4.94  0.02  
## 1456    6 -52.75 119.29 4.95  0.02  
## 1246    6 -52.75 119.29 4.95  0.02  
## 17      4 -55.28 119.37 5.03  0.02  
## 15      4 -55.35 119.52 5.19  0.01  
## 12      4 -55.46 119.73 5.39  0.01  
## 16      4 -55.46 119.73 5.40  0.01  
## 24      4 -55.49 119.79 5.46  0.01  
## 47      4 -55.75 120.31 5.97  0.01  
## 234     5 -54.56 120.37 6.03  0.01  
## 46      4 -55.83 120.48 6.15  0.01  
## 45      4 -55.83 120.49 6.15  0.01  
## 347     5 -54.93 121.12 6.78  0.01  
## 346     5 -55.05 121.35 7.01  0.01  
## 345     5 -55.05 121.35 7.02  0.01  
## 12347   7 -52.53 121.49 7.15  0.01  
## 157     5 -55.14 121.52 7.19  0.01  
## 13457   7 -52.55 121.53 7.19  0.01  
## 13467   7 -52.58 121.59 7.25  0.01  
## 12345   7 -52.60 121.63 7.29  0.01  
## 12346   7 -52.61 121.65 7.32  0.00  
## 12457   7 -52.64 121.71 7.38  0.00  
## 14567   7 -52.65 121.73 7.39  0.00  
## 13456   7 -52.65 121.73 7.40  0.00  
## 12467   7 -52.65 121.74 7.41  0.00  
## 167     5 -55.28 121.80 7.47  0.00
```

```

## 127      5 -55.28 121.80  7.47  0.00
## 247      5 -55.32 121.88  7.55  0.00
## 12456     7 -52.74 121.92  7.58  0.00
## 125      5 -55.35 121.95  7.61  0.00
## 156      5 -55.35 121.96  7.62  0.00
## 245      5 -55.45 122.15  7.81  0.00
## 126      5 -55.46 122.16  7.83  0.00
## 246      5 -55.48 122.21  7.87  0.00
## 467      5 -55.69 122.63  8.29  0.00
## 2347     6 -54.43 122.64  8.31  0.00
## 457      5 -55.70 122.65  8.32  0.00
## 2346     6 -54.48 122.74  8.41  0.00
## 456      5 -55.79 122.84  8.50  0.00
## 2345     6 -54.56 122.90  8.57  0.00
## 3467     6 -54.93 123.64  9.31  0.00
## 3457     6 -54.93 123.65  9.32  0.00
## 3456     6 -55.05 123.88  9.55  0.00
## 1257     6 -55.13 124.05  9.72  0.00
## 1567     6 -55.14 124.06  9.72  0.00
## 123457   8 -52.49 124.18  9.85  0.00
## 123467   8 -52.52 124.23  9.90  0.00
## 134567   8 -52.55 124.29  9.96  0.00
##
## Term codes:
##          lam(dcon)          lam(drios) lam(I(tree_1000m^2))
##              1              2              3
##          lam(tree_1000m)          p(date)          p(dras)
##              4              5              6
##              p(sfrz)
##              7
##
## Model-averaged coefficients:
## (full average)
##          Estimate Std. Error z value Pr(>|z|)
## lam(Int)          0.837624  1.351571  0.620  0.535
## lam(dcon)         -1.784306  1.201836  1.485  0.138
## lam(tree_1000m)   0.806467  0.629903  1.280  0.200
## p(Int)            -5.113520  1.007256  5.077  4e-07 ***
## p(sfrz)           0.098980  0.471376  0.210  0.834
## lam(I(tree_1000m^2)) -0.067226  0.265115  0.254  0.800
## p(date)           0.015204  0.212007  0.072  0.943
## lam(drios)        -0.023838  0.199382  0.120  0.905
## p(dras)           0.001795  0.196068  0.009  0.993
##
## (conditional average)
##          Estimate Std. Error z value Pr(>|z|)
## lam(Int)          0.837624  1.351571  0.620  0.5354
## lam(dcon)         -2.097631  1.020200  2.056  0.0398 *
## lam(tree_1000m)   0.924982  0.587760  1.574  0.1155
## p(Int)            -5.113520  1.007256  5.077  4e-07 ***
## p(sfrz)           0.417023  0.896397  0.465  0.6418
## lam(I(tree_1000m^2)) -0.289198  0.488024  0.593  0.5535
## p(date)           0.068966  0.447411  0.154  0.8775
## lam(drios)        -0.103903  0.406142  0.256  0.7981

```



```
## p(dras)          0.008349  0.422742  0.020  0.9842
## ---
## Signif. codes:  0 '***' 0.001 '**' 0.01 '*' 0.05 '.' 0.1 ' ' 1
```

```
ss <- match(rownames(get(sprintf("UMF.%s", spp))@y), cam.data$cdg)
prd <- predict(get(sprintf("mavg%s.%s", mod, spp)), type='state')
dtf <- data.frame(fit=prd$fit, se.fit=prd$se.fit, hunting=cam.data[ss, "hunting"], dcon=cam.data[ss, "dcon"])
ggplot(dtf, aes(y=dcon, x=tree_1000m, size=fit, colour=se.fit)) +
  geom_point() + ylab("Distance to conucos (m)") + xlab("Tree cover (% in 1km buffer)") +
  labs(title=spp, size='Predicted values', colour='Prediction S.E.')
```

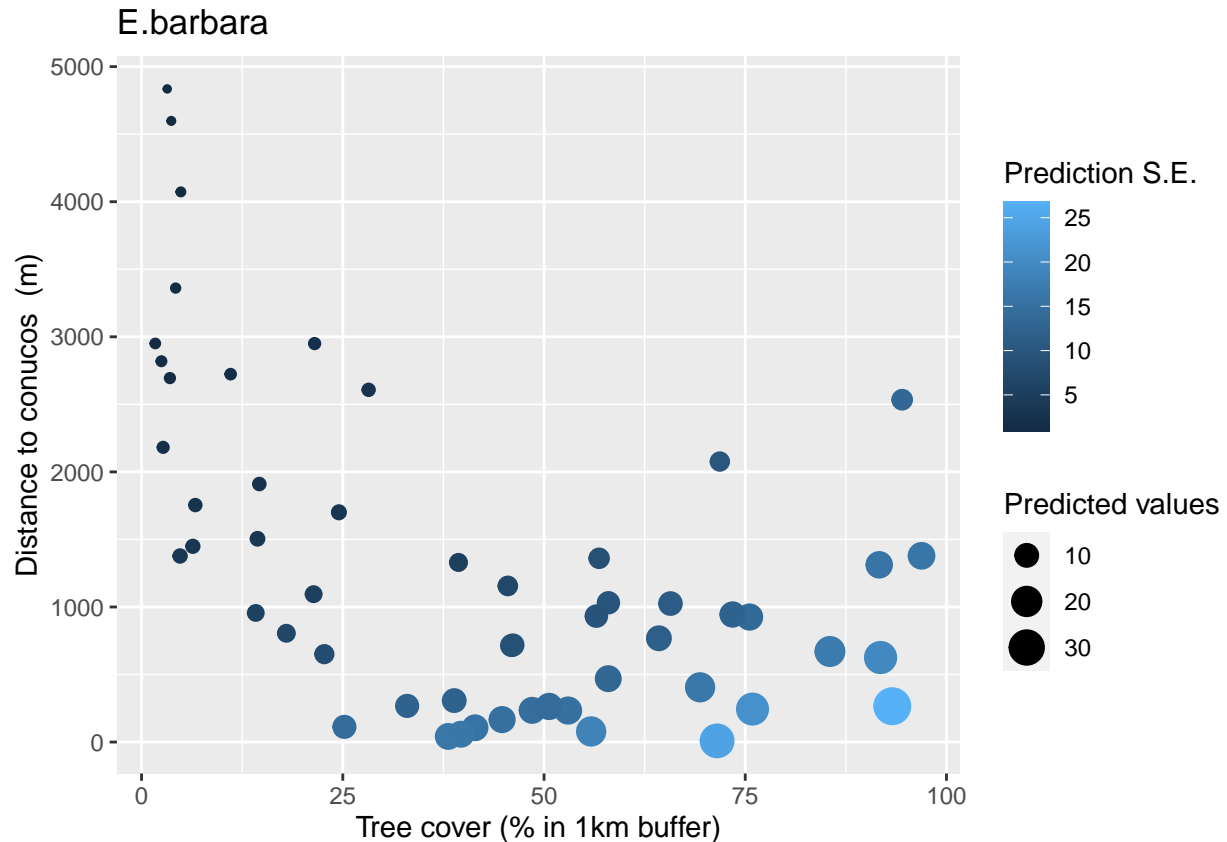

### D.novemcinctus

No sign of lack of fit,  $c\text{-hat} > 1$  overdispersion (used to adjust standard errors)

```
spp <- "D.novemcinctus"
mod <- ifelse(spp %in% with.quad.term, "03", "01")

tbl1 %>% filter(species %in% spp) %>% select(1:5)
```

```
##          species n.detect chi.square p.value c.hat.est
## 1 D.novemcinctus      17   956.2648 0.1418 1.285367
```

Most support for variables:

```
sw(get(sprintf("oms%s.%s", mod, spp)))
```

```
##          p(date) lam(tree_1000m) lam(dcon) lam(drios) p(dras)
## Sum of weights: 0.85      0.41      0.32      0.23      0.23
```

```
## N containing models: 32      32      32      32      32
##                               p(sfrz)
## Sum of weights:      0.22
## N containing models: 32
```

Summary of model averaging estimates (use conditional average):

```
summary(get(sprintf("mavg%s.%s",mod,spp)))
```

```
##
## Call:
## model.avg(object = get.models(object = oms01, subset = delta <
##      10))
##
## Component model call:
## occuRN(formula = ~<56 unique rhs>, data = UMF, K = 50)
##
## Component models:
##      df logLik  QAICc delta weight
## 4      3 -56.66  96.98  0.00  0.14
## 34     4 -55.25  97.22  0.25  0.13
## 14     4 -55.75  98.00  1.02  0.09
## 45     4 -56.56  99.25  2.27  0.05
## 24     4 -56.62  99.34  2.37  0.04
## 46     4 -56.64  99.38  2.40  0.04
## 134    5 -55.09  99.51  2.54  0.04
## 234    5 -55.12  99.55  2.57  0.04
## 346    5 -55.21  99.70  2.72  0.04
## 345    5 -55.24  99.75  2.77  0.04
## 146    5 -55.72 100.49  3.52  0.02
## 145    5 -55.74 100.52  3.55  0.02
## 124    5 -55.75 100.54  3.56  0.02
## (Null) 2 -60.55 100.70  3.72  0.02
## 1      3 -59.29 101.06  4.09  0.02
## 3      3 -59.48 101.37  4.39  0.02
## 456    5 -56.53 101.74  4.77  0.01
## 245    5 -56.54 101.76  4.78  0.01
## 246    5 -56.60 101.85  4.87  0.01
## 1234   6 -55.03 102.06  5.08  0.01
## 1346   6 -55.05 102.10  5.12  0.01
## 2346   6 -55.08 102.14  5.17  0.01
## 1345   6 -55.09 102.16  5.18  0.01
## 2345   6 -55.12 102.20  5.22  0.01
## 3456   6 -55.20 102.33  5.35  0.01
## 5      3 -60.20 102.49  5.52  0.01
## 2      3 -60.37 102.75  5.77  0.01
## 6      3 -60.46 102.89  5.91  0.01
## 13     4 -58.94 102.96  5.99  0.01
## 1456   6 -55.72 103.13  6.15  0.01
## 1246   6 -55.72 103.14  6.16  0.01
## 1245   6 -55.74 103.17  6.19  0.01
## 16     4 -59.19 103.35  6.38  0.01
## 15     4 -59.21 103.38  6.40  0.01
## 35     4 -59.26 103.46  6.48  0.01
## 12     4 -59.28 103.49  6.52  0.01
```

```

## 23      4 -59.30 103.51  6.54  0.01
## 36      4 -59.38 103.64  6.66  0.01
## 2456    6 -56.51 104.37  7.39  0.00
## 12346   7 -54.99 104.77  7.79  0.00
## 56      4 -60.10 104.77  7.79  0.00
## 25      4 -60.13 104.81  7.83  0.00
## 12345   7 -55.03 104.82  7.85  0.00
## 13456   7 -55.05 104.86  7.88  0.00
## 23456   7 -55.08 104.91  7.93  0.00
## 26      4 -60.29 105.06  8.09  0.00
## 136     5 -58.84 105.34  8.36  0.00
## 135     5 -58.86 105.37  8.40  0.00
## 123     5 -58.93 105.48  8.50  0.00
## 156     5 -59.11 105.77  8.79  0.00
## 356     5 -59.15 105.82  8.84  0.00
## 235     5 -59.15 105.82  8.84  0.00
## 126     5 -59.19 105.88  8.91  0.00
## 12456   7 -55.71 105.89  8.91  0.00
## 125     5 -59.20 105.91  8.93  0.00
## 236     5 -59.20 105.91  8.93  0.00
##
## Term codes:
##      lam(dcon)      lam(drios) lam(tree_1000m)      p(date)      p(dras)
##      1          2          3          4          5
##      p(sfrz)
##      6
##
## Model-averaged coefficients:
## (full average)
##      Estimate Std. Error z value Pr(>|z|)
## lam(Int)      -0.44460   0.73102  0.608  0.54306
## p(Int)        -2.69540   0.92344  2.919  0.00351 **
## p(date)       -1.20607   0.70516  1.710  0.08720 .
## lam(tree_1000m) 0.20297   0.32733  0.620  0.53520
## lam(dcon)     -0.22384   0.52031  0.430  0.66705
## p(dras)        0.03577   0.26640  0.134  0.89318
## lam(drios)    -0.02778   0.20749  0.134  0.89350
## p(sfrz)       -0.05447   0.43379  0.126  0.90007
##
## (conditional average)
##      Estimate Std. Error z value Pr(>|z|)
## lam(Int)      -0.4446   0.7310  0.608  0.54306
## p(Int)        -2.6954   0.9234  2.919  0.00351 **
## p(date)       -1.4134   0.5383  2.626  0.00864 **
## lam(tree_1000m) 0.5009   0.3394  1.476  0.13996
## lam(dcon)     -0.7070   0.7166  0.987  0.32382
## p(dras)        0.1587   0.5434  0.292  0.77027
## lam(drios)    -0.1232   0.4232  0.291  0.77105
## p(sfrz)       -0.2457   0.8954  0.274  0.78378
## ---
## Signif. codes:  0 '***' 0.001 '**' 0.01 '*' 0.05 '.' 0.1 ' ' 1

```

```

ss <- match(rownames(get(sprintf("UMF.%s", spp))@y), cam.data$cdg)
prd <- predict(get(sprintf("mavg%s.%s", mod, spp)), type='state')

```

```

dtf <- data.frame(fit=prd$fit, se.fit=prd$se.fit, hunting=cam.data[ss,"hunting"], dcon=cam.data[ss,"dcon"])
ggplot(dtf, aes(y=dcon, x=tree_1000m,size=fit,colour=se.fit)) +
  geom_point() + ylab("Distance to conucos (m)") + xlab("Tree cover (% in 1km buffer)") +
  labs(title=spp,size='Predicted values',colour='Prediction S.E. ')

```

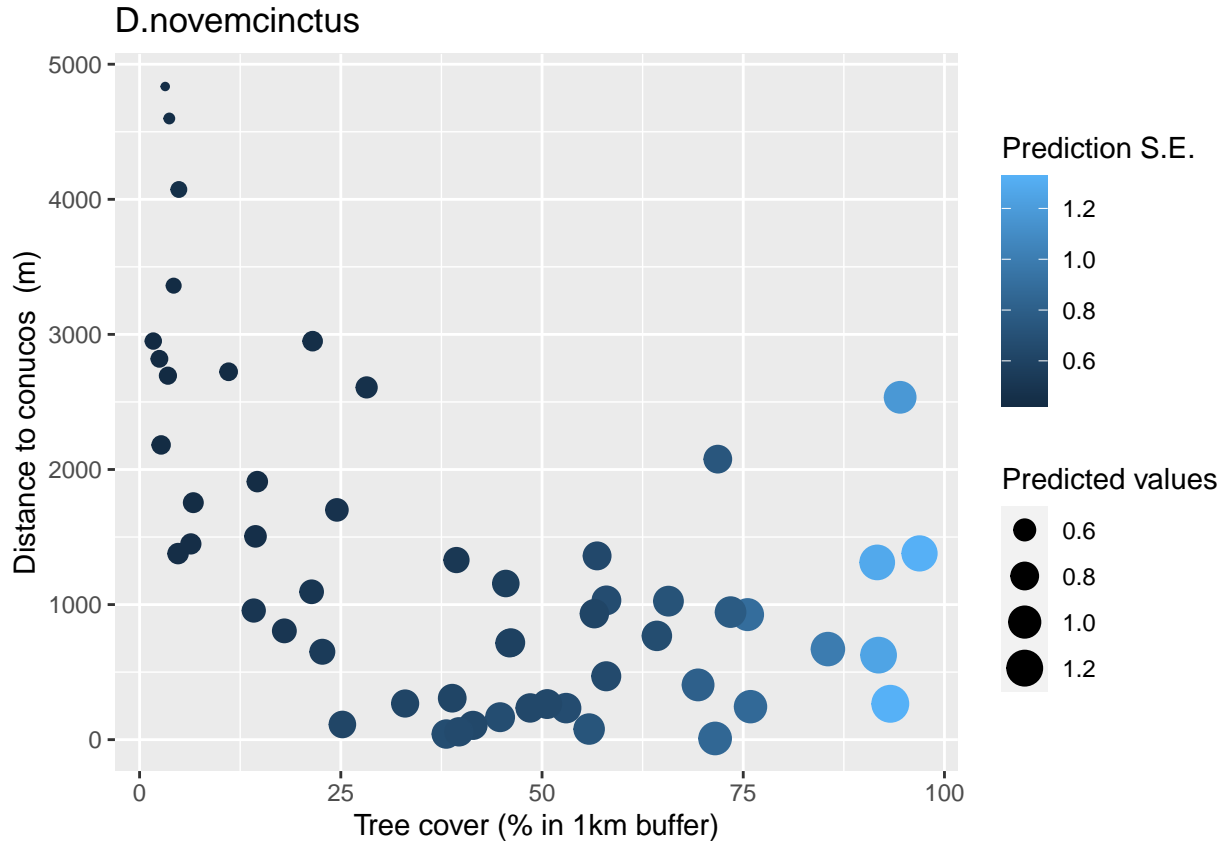

### M.americana

No sign of lack of fit, c-hat values less than 1

```

spp <- "M.americana"
mod <- ifelse(spp %in% with.quad.term,"03","01")

tbl1 %>% filter(species %in% spp) %>% select(1:5)

```

```

##      species n.detect chi.square p.value c.hat.est
## 1 M.americana      17   242.7862 0.7573 0.317484

```

Most support for variables:

```
sw(get(sprintf("oms%s.%s",mod,spp)))
```

```

##          p(sfrz) lam(tree_1000m) p(date) lam(drios) lam(dcon)
## Sum of weights:      1.00      0.98      0.88      0.25      0.24
## N containing models:  32        32        32        32        32
##          p(dras)
## Sum of weights:      0.23
## N containing models:  32

```

Summary of model averaging estimates (use conditional average): [Check coefficients (too high?)]

```
summary(get(sprintf("mavg%s.%s",mod,spp)))
```

```
##
## Call:
## model.avg(object = get.models(object = oms01, subset = delta <
##      10))
##
## Component model call:
## occuRN(formula = ~<17 unique rhs>, data = UMF, K = 50)
##
## Component models:
##      df logLik   AICc delta weight
## 346    5 -40.07  91.39  0.00  0.39
## 2346   6 -39.90  93.59  2.20  0.13
## 3456   6 -40.02  93.84  2.44  0.12
## 1346   6 -40.03  93.84  2.45  0.12
## 36     4 -43.56  95.93  4.54  0.04
## 12346  7 -39.78  95.99  4.60  0.04
## 23456  7 -39.84  96.10  4.71  0.04
## 13456  7 -40.00  96.43  5.04  0.03
## 356    5 -43.00  97.26  5.86  0.02
## 136    5 -43.09  97.43  6.04  0.02
## 236    5 -43.47  98.18  6.79  0.01
## 123456 8 -39.75  98.69  7.30  0.01
## 1356   6 -42.77  99.34  7.94  0.01
## 1236   6 -42.81  99.41  8.02  0.01
## 2356   6 -42.85  99.48  8.09  0.01
## 146    5 -44.41 100.07  8.68  0.01
## 46     4 -46.27 101.36  9.97  0.00
##
## Term codes:
##      lam(dcon)      lam(drios) lam(tree_1000m)      p(date)      p(dras)
##           1              2              3              4              5
##      p(sfrz)
##           6
##
## Model-averaged coefficients:
## (full average)
##      Estimate Std. Error z value Pr(>|z|)
## lam(Int)      -2.02466    0.68942  2.937 0.00332 **
## lam(tree_1000m) 1.42569    0.50834  2.805 0.00504 **
## p(Int)         -7.28819    2.43592  2.992 0.00277 **
## p(date)        -1.55978    0.88360  1.765 0.07752 .
## p(sfrz)         6.18262    2.47429  2.499 0.01246 *
## lam(drios)     0.05930    0.21944  0.270 0.78698
## p(dras)         0.06708    0.37205  0.180 0.85692
## lam(dcon)      -0.11300    0.60532  0.187 0.85192
##
## (conditional average)
##      Estimate Std. Error z value Pr(>|z|)
## lam(Int)      -2.0247    0.6894  2.937 0.00332 **
## lam(tree_1000m) 1.4370    0.4942  2.907 0.00364 **
## p(Int)         -7.2882    2.4359  2.992 0.00277 **
```

```
## p(date)          -1.7639    0.7231    2.439  0.01471 *
## p(sfrz)          6.1826    2.4743    2.499  0.01246 *
## lam(drrios)      0.2413    0.3899    0.619  0.53605
## p(dras)          0.2905    0.7312    0.397  0.69112
## lam(dcon)       -0.4781    1.1729    0.408  0.68355
## ---
## Signif. codes:  0 '***' 0.001 '**' 0.01 '*' 0.05 '.' 0.1 ' ' 1
```

```
ss <- match(rownames(get(sprintf("UMF.%s", spp))@y), cam.data$cdg)
prd <- predict(get(sprintf("mavg%s.%s", mod, spp)), type='state')
dtf <- data.frame(fit=prd$fit, se.fit=prd$se.fit, hunting=cam.data[ss, "hunting"], dcon=cam.data[ss, "dcon"])
ggplot(dtf, aes(y=dcon, x=tree_1000m, size=fit, colour=se.fit)) +
  geom_point() + ylab("Distance to conucos (m)") + xlab("Tree cover (% in 1km buffer)") +
  labs(title=spp, size='Predicted values', colour='Prediction S.E.')
```

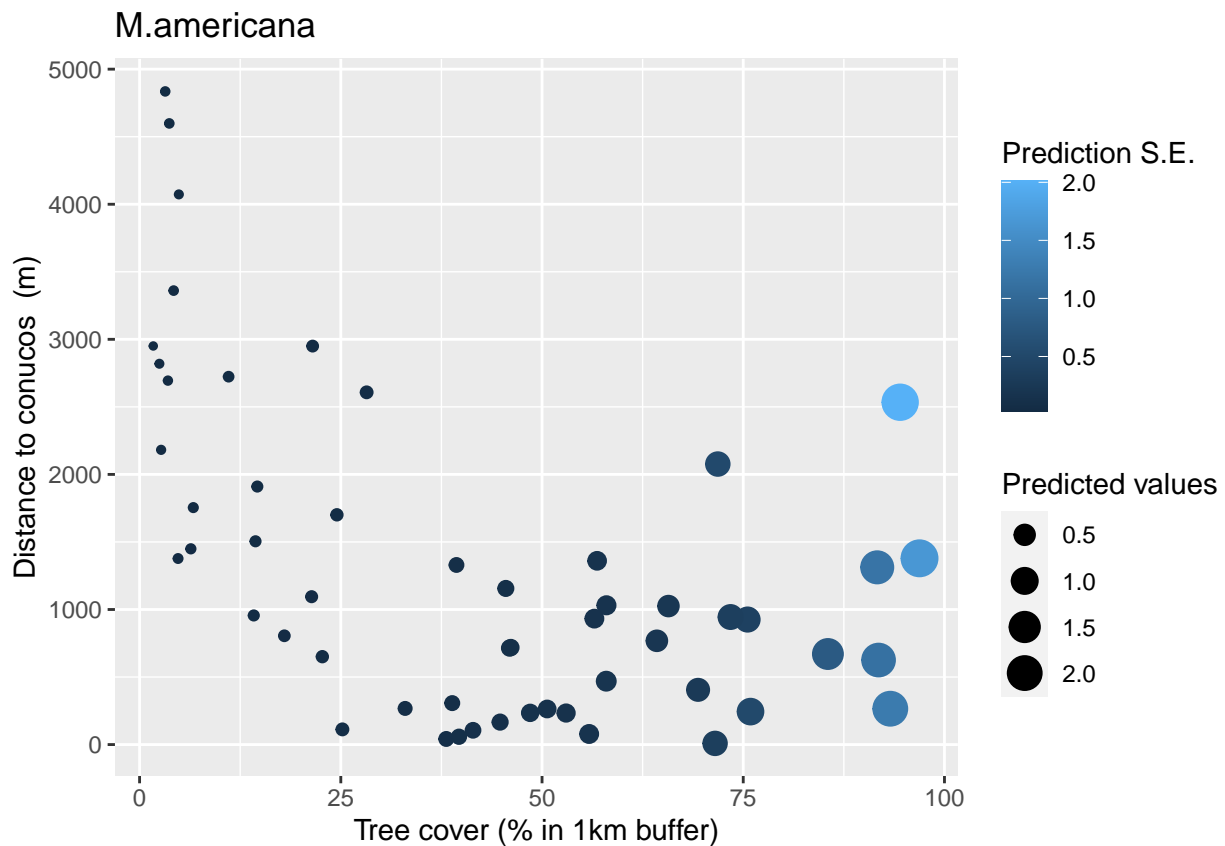

### T.major

No sign of lack of fit, c-hat values less than 1 (maybe too low?)

```
spp <- "T.major"
mod <- ifelse(spp %in% with.quad.term, "03", "01")

tbl1 %>% filter(species %in% spp) %>% select(1:5)
```

```
## species n.detect chi.square p.value c.hat.est
## 1 T.major      18  319.0557  0.9109 0.2109133
```

Most support for variables:

```
sw(get(sprintf("oms%s.%s",mod,spp)))
```

```
##                lam(tree_1000m) p(dras) lam(dcon) lam(drios) p(date)
## Sum of weights:      0.97          0.29   0.25     0.24     0.24
## N containing models:  32           32     32      32      32
##                p(sfrz)
## Sum of weights:      0.23
## N containing models:  32
```

Summary of model averaging estimates (use conditional average):

```
summary(get(sprintf("mavg%s.%s",mod,spp)))
```

```
##
## Call:
## model.avg(object = get.models(object = oms01, subset = delta <
##      10))
##
## Component model call:
## occuRN(formula = ~<36 unique rhs>, data = UMF, K = 50)
##
## Component models:
##      df logLik   AICc delta weight
## 3      3 -50.82 108.12  0.00  0.23
## 35     4 -50.57 109.96  1.83  0.09
## 23     4 -50.77 110.36  2.23  0.08
## 13     4 -50.79 110.39  2.26  0.08
## 36     4 -50.81 110.43  2.30  0.07
## 34     4 -50.81 110.44  2.32  0.07
## 135    5 -50.33 111.92  3.79  0.03
## 345    5 -50.44 112.12  4.00  0.03
## 235    5 -50.53 112.31  4.19  0.03
## 356    5 -50.56 112.37  4.24  0.03
## 123    5 -50.67 112.59  4.46  0.03
## 236    5 -50.75 112.75  4.63  0.02
## 234    5 -50.76 112.76  4.64  0.02
## 136    5 -50.77 112.78  4.66  0.02
## 134    5 -50.78 112.82  4.69  0.02
## 346    5 -50.79 112.84  4.71  0.02
## 1235   6 -50.12 114.03  5.91  0.01
## 1345   6 -50.23 114.26  6.13  0.01
## 1356   6 -50.32 114.42  6.30  0.01
## 2345   6 -50.39 114.56  6.44  0.01
## 3456   6 -50.42 114.62  6.50  0.01
## 2356   6 -50.52 114.82  6.70  0.01
## 1236   6 -50.64 115.07  6.94  0.01
## 1234   6 -50.67 115.12  7.00  0.01
## 2346   6 -50.74 115.26  7.13  0.01
## 1346   6 -50.76 115.31  7.19  0.01
## (Null) 2 -55.85 115.93  7.81  0.00
## 12345  7 -50.02 116.48  8.35  0.00
## 12356  7 -50.10 116.63  8.50  0.00
## 1      3 -55.13 116.74  8.62  0.00
## 13456  7 -50.21 116.86  8.73  0.00
## 23456  7 -50.37 117.17  9.04  0.00
```

```

## 12346  7 -50.64 117.71  9.59  0.00
## 4      3 -55.63 117.75  9.62  0.00
## 2      3 -55.75 117.98  9.85  0.00
## 5      3 -55.79 118.06  9.93  0.00
##
## Term codes:
##      lam(dcon)      lam(drios) lam(tree_1000m)      p(date)      p(dras)
##      1          2          3          4          5
##      p(sfrz)
##      6
##
## Model-averaged coefficients:
## (full average)
##      Estimate Std. Error z value Pr(>|z|)
## lam(Int)      -1.89072   0.60283  3.136 0.00171 **
## lam(tree_1000m) 1.19739   0.44927  2.665 0.00769 **
## p(Int)        -1.35424   0.61794  2.192 0.02841 *
## p(dras)        0.14388   0.39619  0.363 0.71649
## lam(drios)    -0.03475   0.20283  0.171 0.86397
## lam(dcon)     0.09300   0.45821  0.203 0.83916
## p(sfrz)       0.04127   0.46150  0.089 0.92875
## p(date)       0.03118   0.26810  0.116 0.90741
##
## (conditional average)
##      Estimate Std. Error z value Pr(>|z|)
## lam(Int)      -1.8907   0.6028  3.136 0.00171 **
## lam(tree_1000m) 1.2132   0.4305  2.818 0.00483 **
## p(Int)        -1.3542   0.6179  2.192 0.02841 *
## p(dras)        0.4962   0.6054  0.820 0.41244
## lam(drios)    -0.1451   0.3946  0.368 0.71319
## lam(dcon)     0.3739   0.8597  0.435 0.66363
## p(sfrz)       0.1812   0.9539  0.190 0.84933
## p(date)       0.1332   0.5416  0.246 0.80580
## ---
## Signif. codes:  0 '***' 0.001 '**' 0.01 '*' 0.05 '.' 0.1 ' ' 1

ss <- match(rownames(get(sprintf("UMF.%s", spp))@y), cam.data$cdg)
prd <- predict(get(sprintf("mavg%s.%s", mod, spp)), type='state')
dtf <- data.frame(fit=prd$fit, se.fit=prd$se.fit, hunting=cam.data[ss, "hunting"], dcon=cam.data[ss, "dcon"])
ggplot(dtf, aes(y=dcon, x=tree_1000m, size=fit, colour=se.fit)) +
  geom_point() + ylab("Distance to conucos (m)") + xlab("Tree cover (% in 1km buffer)") +
  labs(title=spp, size='Predicted values', colour='Prediction S.E.')

```



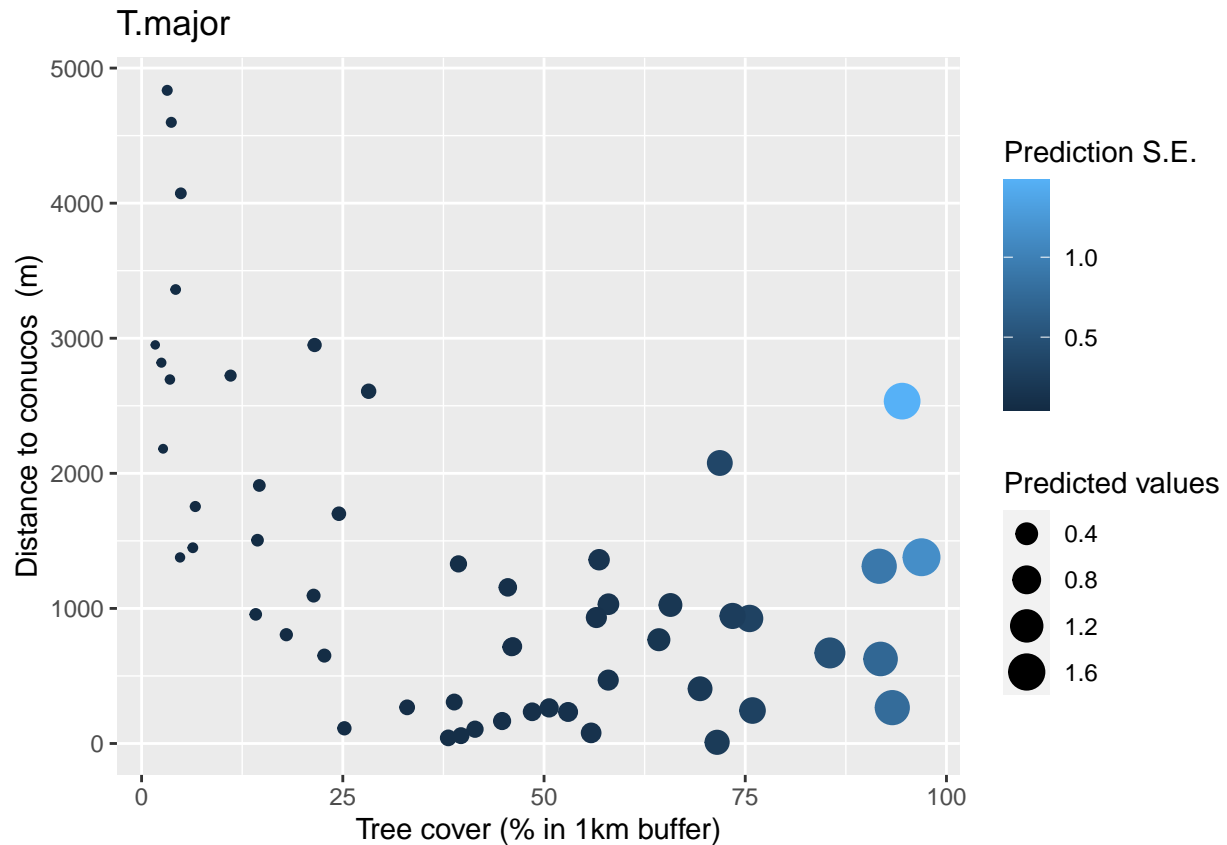

### C.thous

No sign of lack of fit, c-hat values less than 1

```
spp <- "C.thous"
mod <- ifelse(spp %in% with.quad.term,"03","01")

tbl1 %>% filter(species %in% spp) %>% select(1:5)
```

```
## species n.detect chi.square p.value c.hat.est
## 1 C.thous      21  1217.307  0.4448  0.5860327
```

Most support for variables:

```
sw(get(sprintf("oms%s.%s",mod,spp)))
```

```
##                lam(tree_1000m) p(sfrz) lam(dcon) lam(drios) p(dras)
## Sum of weights:      0.54          0.42   0.31     0.31     0.26
## N containing models:  32           32     32     32     32
##                p(date)
## Sum of weights:      0.23
## N containing models:  32
```

Summary of model averaging estimates (use conditional average):

```
summary(get(sprintf("mavg%s.%s",mod,spp)))
```

```
##
## Call:
```

```

## model.avg(object = get.models(object = oms01, subset = delta <
##      10))
##
## Component model call:
## occuRN(formula = ~<64 unique rhs>, data = UMF, K = 50)
##
## Component models:
##      df logLik  AICc delta weight
## 3      3 -50.33 107.14 0.00 0.09
## 36     4 -49.44 107.70 0.56 0.07
## (Null) 2 -51.86 107.96 0.82 0.06
## 6      3 -51.02 108.52 1.38 0.05
## 23     4 -50.00 108.82 1.68 0.04
## 1      3 -51.26 109.01 1.87 0.04
## 35     4 -50.18 109.19 2.05 0.03
## 236    5 -49.06 109.37 2.24 0.03
## 13     4 -50.33 109.47 2.34 0.03
## 34     4 -50.33 109.47 2.34 0.03
## 16     4 -50.42 109.66 2.52 0.03
## 5      3 -51.64 109.76 2.62 0.03
## 356    5 -49.31 109.86 2.72 0.02
## 12     4 -50.53 109.87 2.73 0.02
## 2      3 -51.74 109.97 2.83 0.02
## 346    5 -49.44 110.12 2.98 0.02
## 136    5 -49.44 110.13 2.99 0.02
## 4      3 -51.86 110.20 3.06 0.02
## 126    5 -49.58 110.40 3.27 0.02
## 56     4 -50.82 110.45 3.31 0.02
## 26     4 -50.88 110.58 3.44 0.02
## 46     4 -51.01 110.83 3.69 0.01
## 235    5 -49.84 110.93 3.79 0.01
## 123    5 -49.84 110.93 3.79 0.01
## 15     4 -51.12 111.06 3.92 0.01
## 234    5 -49.99 111.24 4.10 0.01
## 14     4 -51.26 111.35 4.21 0.01
## 1236   6 -48.88 111.55 4.42 0.01
## 345    5 -50.17 111.59 4.45 0.01
## 135    5 -50.18 111.62 4.48 0.01
## 2356   6 -48.92 111.63 4.49 0.01
## 156    5 -50.29 111.83 4.69 0.01
## 25     4 -51.51 111.84 4.70 0.01
## 2346   6 -49.04 111.86 4.72 0.01
## 134    5 -50.33 111.91 4.77 0.01
## 45     4 -51.63 112.07 4.94 0.01
## 146    5 -50.42 112.08 4.94 0.01
## 125    5 -50.42 112.09 4.95 0.01
## 124    5 -50.50 112.26 5.12 0.01
## 24     4 -51.74 112.29 5.15 0.01
## 3456   6 -49.30 112.39 5.25 0.01
## 1356   6 -49.30 112.39 5.25 0.01
## 256    5 -50.67 112.60 5.46 0.01
## 1346   6 -49.44 112.66 5.52 0.01
## 1256   6 -49.50 112.79 5.65 0.01
## 1246   6 -49.52 112.83 5.69 0.01

```

```

## 456      5 -50.81 112.87  5.74  0.01
## 246      5 -50.87 112.98  5.84  0.01
## 1235     6 -49.72 113.23  6.09  0.00
## 1234     6 -49.82 113.44  6.30  0.00
## 2345     6 -49.83 113.45  6.32  0.00
## 145      5 -51.11 113.47  6.33  0.00
## 12356    7 -48.79 114.02  6.88  0.00
## 12346    7 -48.84 114.11  6.97  0.00
## 1345     6 -50.17 114.12  6.98  0.00
## 245      5 -51.50 114.26  7.12  0.00
## 23456    7 -48.92 114.28  7.14  0.00
## 1456     6 -50.29 114.37  7.23  0.00
## 1245     6 -50.42 114.62  7.48  0.00
## 13456    7 -49.30 115.03  7.90  0.00
## 2456     6 -50.67 115.13  7.99  0.00
## 12456    7 -49.49 115.41  8.27  0.00
## 12345    7 -49.72 115.88  8.74  0.00
## 123456   8 -48.78 116.77  9.63  0.00
##
## Term codes:
##      lam(dcon)      lam(drios) lam(tree_1000m)      p(date)      p(dras)
##          1              2              3              4              5
##      p(sfrz)
##          6
##
## Model-averaged coefficients:
## (full average)
##      Estimate Std. Error z value Pr(>|z|)
## lam(Int)      -1.625398  0.375109  4.333 1.47e-05 ***
## lam(tree_1000m) -0.358238  0.461803  0.776  0.438
## p(Int)        -0.641664  0.871699  0.736  0.462
## p(sfrz)       0.606779  1.010982  0.600  0.548
## lam(drios)    -0.114682  0.303275  0.378  0.705
## lam(dcon)     0.136280  0.406504  0.335  0.737
## p(dras)       -0.052414  0.204854  0.256  0.798
## p(date)       0.007965  0.314492  0.025  0.980
##
## (conditional average)
##      Estimate Std. Error z value Pr(>|z|)
## lam(Int)      -1.62540  0.37511  4.333 1.47e-05 ***
## lam(tree_1000m) -0.66083  0.43981  1.503  0.133
## p(Int)        -0.64166  0.87170  0.736  0.462
## p(sfrz)       1.44066  1.10696  1.301  0.193
## lam(drios)    -0.37186  0.45011  0.826  0.409
## lam(dcon)     0.43677  0.63116  0.692  0.489
## p(dras)       -0.20219  0.36277  0.557  0.577
## p(date)       0.03444  0.65327  0.053  0.958
## ---
## Signif. codes:  0 '***' 0.001 '**' 0.01 '*' 0.05 '.' 0.1 ' ' 1

```

```

ss <- match(rownames(get(sprintf("UMF.%s", spp))@y), cam.data$cdg)
prd <- predict(get(sprintf("mavg%s.%s", mod, spp)), type='state')
dtf <- data.frame(fit=prd$fit, se.fit=prd$se.fit, hunting=cam.data[ss, "hunting"], dcon=cam.data[ss, "dcon"])
ggplot(dtf, aes(y=dcon, x=tree_1000m, size=fit, colour=se.fit)) +

```

```
geom_point() + ylab("Distance to conucos (m)") + xlab("Tree cover (% in 1km buffer)") +
labs(title=spp,size='Predicted values',colour='Prediction S.E.')
```

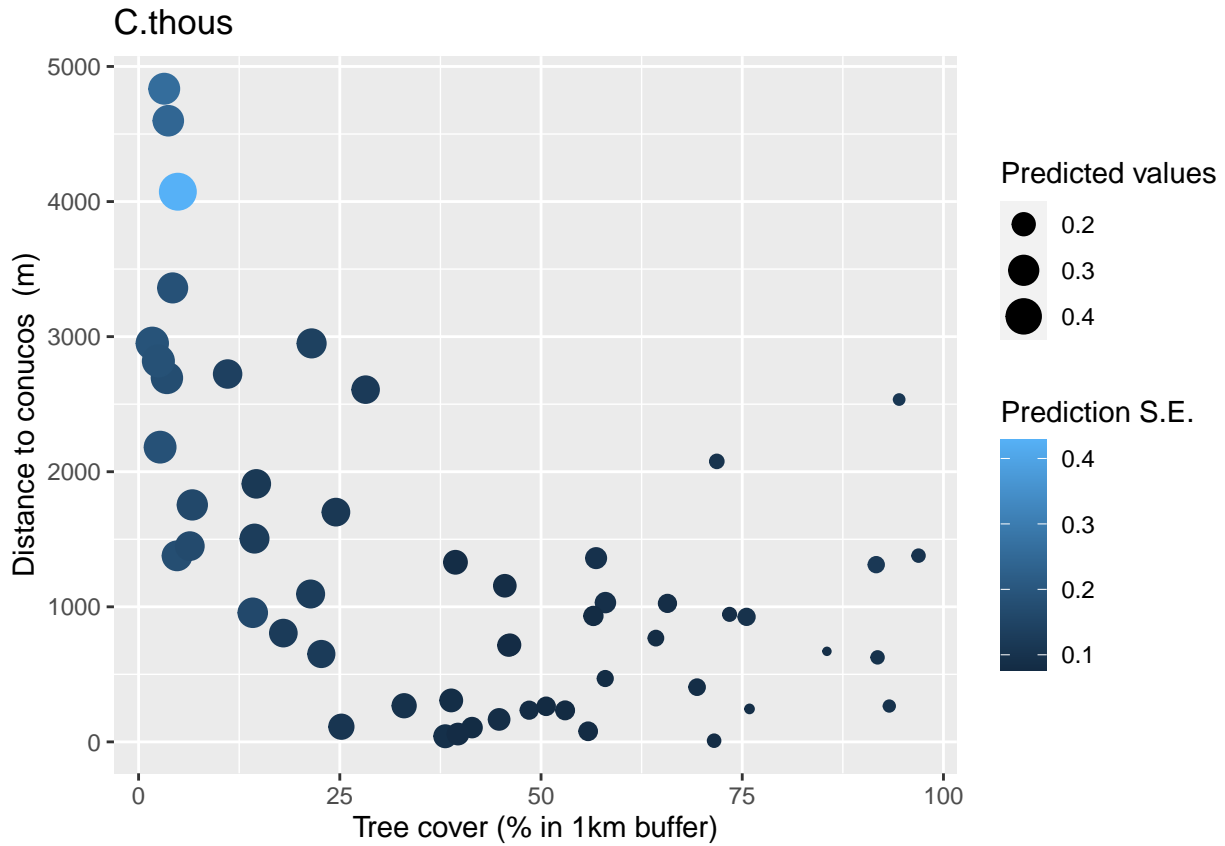

### D.kappleri

No sign of lack of fit,  $\hat{c}$  values less than 1

```
spp <- "D.kappleri"
mod <- ifelse(spp %in% with.quad.term,"03","01")

tbl1 %>% filter(species %in% spp) %>% select(1:5)
```

```
##      species n.detect chi.square p.value c.hat.est
## 1 D.kappleri      25   922.3673  0.4659 0.7568927
```

Most support for variables:

```
sw(get(sprintf("oms%s.%s",mod,spp)))
```

```
##          lam(tree_1000m) p(sfrz) p(dras) lam(dcon) p(date)
## Sum of weights:         1.00      0.65  0.49   0.47   0.46
## N containing models:    32       32   32    32    32
##          lam(drios)
## Sum of weights:         0.45
## N containing models:    32
```

Summary of model averaging estimates (use conditional average):

```
summary(get(sprintf("mavg%s.%s",mod,spp)))
```

```
##
## Call:
## model.avg(object = get.models(object = oms01, subset = delta <
##      10))
##
## Component model call:
## occuRN(formula = ~<32 unique rhs>, data = UMF, K = 50)
##
## Component models:
##      df logLik  AICc delta weight
## 2346   6 -61.22 136.24  0.00  0.06
## 1356   6 -61.32 136.44  0.20  0.05
## 136    5 -62.60 136.46  0.22  0.05
## 356    5 -62.69 136.62  0.39  0.05
## 2356   6 -61.44 136.67  0.43  0.05
## 346    5 -62.74 136.73  0.50  0.05
## 1346   6 -61.54 136.86  0.62  0.04
## 236    5 -62.83 136.91  0.67  0.04
## 3456   6 -61.61 137.01  0.78  0.04
## 135    5 -62.96 137.18  0.94  0.04
## 23456  7 -60.37 137.18  0.94  0.04
## 36     4 -64.22 137.25  1.01  0.04
## 1236   6 -61.79 137.37  1.14  0.03
## 12356  7 -60.53 137.49  1.25  0.03
## 13     4 -64.35 137.51  1.27  0.03
## 12346  7 -60.56 137.55  1.31  0.03
## 13456  7 -60.57 137.58  1.35  0.03
## 35     4 -64.42 137.66  1.43  0.03
## 235    5 -63.31 137.88  1.64  0.03
## 134    5 -63.35 137.96  1.72  0.02
## 345    5 -63.42 138.09  1.86  0.02
## 234    5 -63.45 138.15  1.91  0.02
## 34     4 -64.73 138.27  2.03  0.02
## 1235   6 -62.26 138.30  2.06  0.02
## 1345   6 -62.28 138.35  2.12  0.02
## 2345   6 -62.34 138.47  2.23  0.02
## 123    5 -63.69 138.62  2.38  0.02
## 123456  8 -59.73 138.67  2.43  0.02
## 3       3 -66.14 138.76  2.52  0.02
## 23     4 -64.98 138.77  2.54  0.02
## 1234   6 -62.56 138.91  2.67  0.02
## 12345  7 -61.56 139.56  3.32  0.01
##
## Term codes:
##      lam(dcon)      lam(drios) lam(tree_1000m)      p(date)      p(dras)
##           1              2              3              4              5
##      p(sfrz)
##           6
##
## Model-averaged coefficients:
## (full average)
##      Estimate Std. Error z value Pr(>|z|)
```

```

## lam(Int)          -0.9813      1.3775   0.712   0.4763
## lam(drios)       -0.2241      0.3433   0.653   0.5139
## lam(tree_1000m)  1.5173      0.3864   3.927  8.62e-05 ***
## p(Int)           -3.8593      1.6843   2.291   0.0219 *
## p(date)          -0.2657      0.3922   0.677   0.4982
## p(sfrz)           1.0020      1.0263   0.976   0.3289
## lam(dcon)        -0.6004      0.8795   0.683   0.4948
## p(dras)           0.3198      0.4378   0.730   0.4651
##
## (conditional average)
##               Estimate Std. Error z value Pr(>|z|)
## lam(Int)       -0.9813      1.3775   0.712   0.4763
## lam(drios)     -0.5006      0.3533   1.417   0.1566
## lam(tree_1000m) 1.5173      0.3864   3.927  8.62e-05 ***
## p(Int)         -3.8593      1.6843   2.291   0.0219 *
## p(date)        -0.5763      0.3934   1.465   0.1429
## p(sfrz)         1.5491      0.8837   1.753   0.0796 .
## lam(dcon)      -1.2759      0.8842   1.443   0.1490
## p(dras)         0.6506      0.4179   1.557   0.1195
## ---
## Signif. codes:  0 '***' 0.001 '**' 0.01 '*' 0.05 '.' 0.1 ' ' 1

```

```

ss <- match(rownames(get(sprintf("UMF.%s", spp))@y), cam.data$cdg)
prd <- predict(get(sprintf("mavg%s.%s", mod, spp)), type='state')
dtf <- data.frame(fit=prd$fit, se.fit=prd$se.fit, hunting=cam.data[ss, "hunting"], dcon=cam.data[ss, "dcon"])
ggplot(dtf, aes(y=dcon, x=tree_1000m, size=fit, colour=se.fit)) +
  geom_point() + ylab("Distance to conucos (m)") + xlab("Tree cover (% in 1km buffer)") +
  labs(title=spp, size='Predicted values', colour='Prediction S.E.')

```

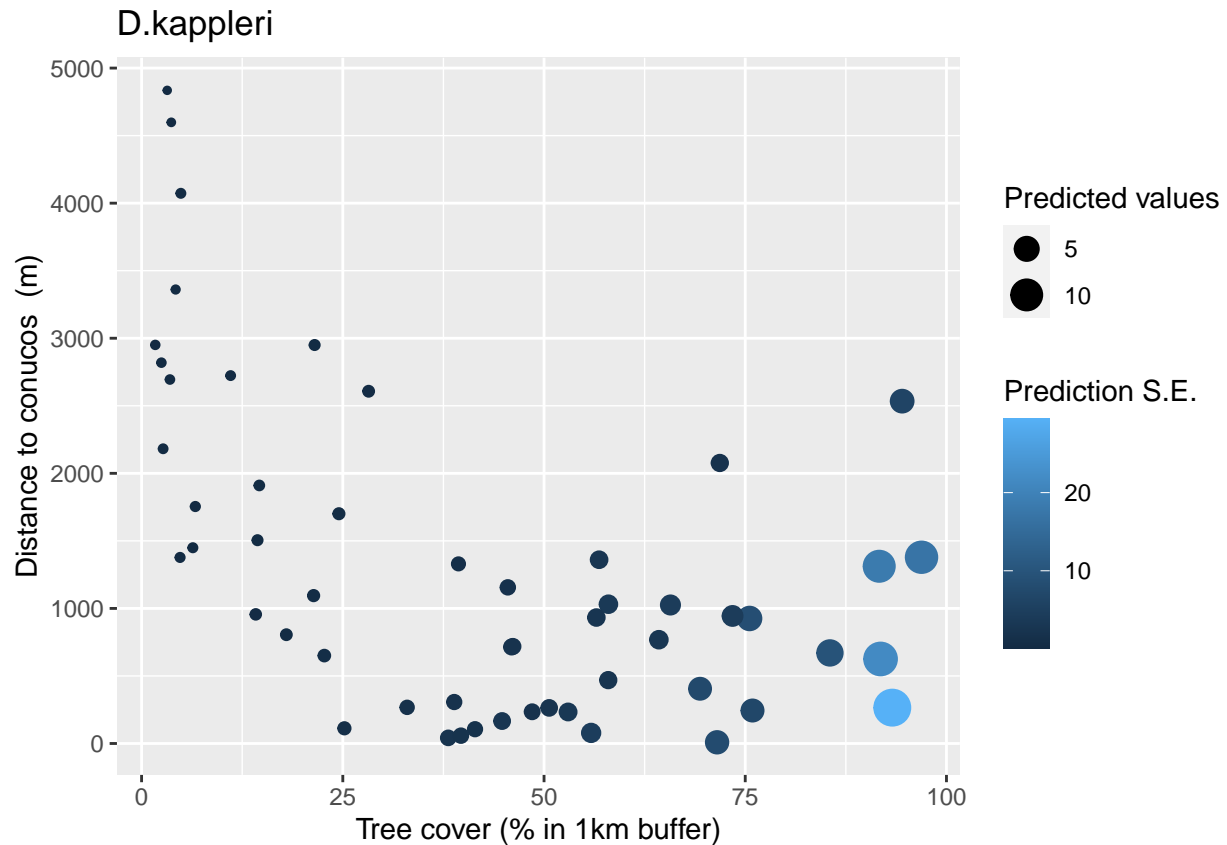

### C.alector

No sign of lack of fit, c-hat values less than 1

```
spp <- "C.alector"
mod <- ifelse(spp %in% with.quad.term,"03","01")
```

```
tbl1 %>% filter(species %in% spp) %>% select(1:5)
```

```
##      species n.detect chi.square p.value c.hat.est
## 1 C.alector      31    1098.64  0.5244 0.6225908
```

Most support for variables:

```
sw(get(sprintf("oms%s.%s",mod,spp)))
```

```
##                lam(tree_1000m) p(sfrz) p(dras) lam(dcon) p(date)
## Sum of weights:      0.98          0.73  0.71    0.64    0.24
## N containing models:  32           32    32     32     32
##
##                lam(drios)
## Sum of weights:      0.23
## N containing models:  32
```

Summary of model averaging estimates (use conditional average):

```
summary(get(sprintf("mavg%s.%s",mod,spp)))
```

```
##
## Call:
```

```

## model.avg(object = get.models(object = oms01, subset = delta <
##      10))
##
## Component model call:
## occuRN(formula = ~<33 unique rhs>, data = UMF, K = 50)
##
## Component models:
##      df logLik   AICc delta weight
## 1356   6 -67.24 148.26  0.00   0.24
## 135    5 -69.41 150.08  1.82   0.10
## 36     4 -70.79 150.40  2.14   0.08
## 12356  7 -67.19 150.81  2.55   0.07
## 356    5 -69.80 150.84  2.59   0.07
## 13456  7 -67.22 150.87  2.61   0.07
## 136    5 -70.30 151.85  3.59   0.04
## 346    5 -70.53 152.30  4.04   0.03
## 1235   6 -69.33 152.44  4.18   0.03
## 1345   6 -69.39 152.57  4.32   0.03
## 35     4 -71.94 152.69  4.43   0.03
## 236    5 -70.78 152.81  4.55   0.02
## 2356   6 -69.57 152.92  4.66   0.02
## 3      3 -73.26 153.00  4.74   0.02
## 3456   6 -69.79 153.37  5.12   0.02
## 123456 8 -67.17 153.53  5.27   0.02
## 1346   6 -69.90 153.60  5.34   0.02
## 1236   6 -70.26 154.30  6.04   0.01
## 235    5 -71.60 154.46  6.20   0.01
## 13     4 -72.87 154.55  6.29   0.01
## 34     4 -72.98 154.77  6.52   0.01
## 2346   6 -70.51 154.80  6.54   0.01
## 12345  7 -69.31 155.05  6.79   0.01
## 345    5 -71.94 155.12  6.86   0.01
## 23     4 -73.25 155.31  7.05   0.01
## 23456  7 -69.57 155.57  7.31   0.01
## 12346  7 -69.87 156.18  7.92   0.00
## 134    5 -72.48 156.21  7.96   0.00
## 6      3 -74.96 156.40  8.14   0.00
## 123    5 -72.85 156.94  8.68   0.00
## 2345   6 -71.60 157.00  8.74   0.00
## 234    5 -72.96 157.16  8.90   0.00
## 56     4 -74.41 157.65  9.39   0.00
##
## Term codes:
##      lam(dcon)      lam(drios) lam(tree_1000m)      p(date)      p(dras)
##          1              2              3              4              5
##      p(sfrz)
##          6
##
## Model-averaged coefficients:
## (full average)
##      Estimate Std. Error z value Pr(>|z|)
## lam(Int)      -0.79852   0.61944   1.289   0.1974
## lam(dcon)       0.92375   0.90787   1.017   0.3089
## lam(tree_1000m) 1.10629   0.39767   2.782   0.0054 **

```



```
## p(Int)          -2.83407    1.16655    2.429    0.0151 *
## p(dras)         0.83791    0.68300    1.227    0.2199
## p(sfrz)         1.23388    1.04486    1.181    0.2376
## lam(drios)      0.02569    0.17240    0.149    0.8815
## p(date)        -0.03600    0.21755    0.165    0.8686
##
## (conditional average)
##               Estimate Std. Error z value Pr(>|z|)
## lam(Int)       -0.7985    0.6194    1.289    0.19736
## lam(dcon)      1.4378    0.7374    1.950    0.05120 .
## lam(tree_1000m) 1.1133    0.3890    2.862    0.00421 **
## p(Int)         -2.8341    1.1666    2.429    0.01512 *
## p(dras)         1.1706    0.5121    2.286    0.02227 *
## p(sfrz)         1.6889    0.8519    1.982    0.04743 *
## lam(drios)      0.1124    0.3468    0.324    0.74587
## p(date)        -0.1549    0.4304    0.360    0.71892
## ---
## Signif. codes:  0 '***' 0.001 '**' 0.01 '*' 0.05 '.' 0.1 ' ' 1
```

```
ss <- match(rownames(get(sprintf("UMF.%s", spp))@y), cam.data$cdg)
prd <- predict(get(sprintf("mavg%s.%s", mod, spp)), type='state')
dtf <- data.frame(fit=prd$fit, se.fit=prd$se.fit, hunting=cam.data[ss, "hunting"], dcon=cam.data[ss, "dcon"])
ggplot(dtf, aes(y=dcon, x=tree_1000m, size=fit, colour=se.fit)) +
  geom_point() + ylab("Distance to conucos (m)") + xlab("Tree cover (% in 1km buffer)") +
  labs(title=spp, size='Predicted values', colour='Prediction S.E.')
```

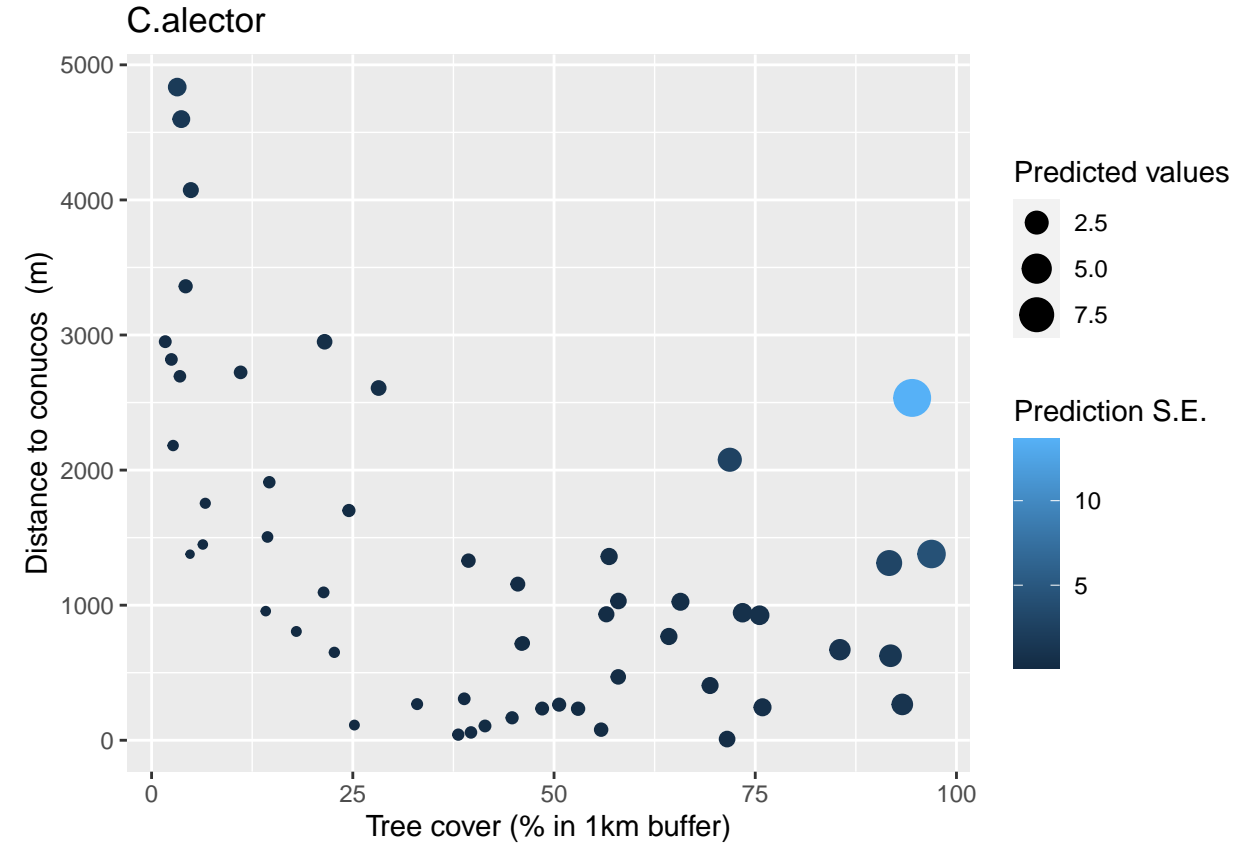

## L.rufaxilla

No sign of lack of fit, c-hat values less than 1

```
spp <- "L.rufaxilla"
mod <- ifelse(spp %in% with.quad.term,"03","01")

tbl1 %>% filter(species %in% spp) %>% select(1:5)
```

```
##      species n.detect chi.square p.value c.hat.est
## 1 L.rufaxilla      33   650.0822  0.6297 0.3598612
```

Most support for variables:

```
sw(get(sprintf("oms%s.%s",mod,spp)))
```

```
##                p(sfrz) lam(tree_1000m) lam(I(tree_1000m^2)) p(date)
## Sum of weights:    1.00    0.85            0.79            0.37
## N containing models:  48      64            32            48
##                lam(dcon) lam(drios) p(dras)
## Sum of weights:    0.31    0.23            0.22
## N containing models:  48      48            48
```

Summary of model averaging estimates (use conditional average):

```
summary(get(sprintf("mavg%s.%s",mod,spp)))
```

```
##
## Call:
## model.avg(object = get.models(object = oms03, subset = delta <
##      10))
##
## Component model call:
## occuRN(formula = ~<42 unique rhs>, data = UMF, K = 50)
##
## Component models:
##      df logLik  AICc delta weight
## 347    5 -69.58 150.40  0.00  0.22
## 3457    6 -68.76 151.31  0.91  0.14
## 1347    6 -69.46 152.70  2.30  0.07
## 2347    6 -69.51 152.81  2.41  0.07
## 3467    6 -69.52 152.83  2.43  0.07
## 13457   7 -68.61 153.66  3.26  0.04
## 23457   7 -68.66 153.76  3.36  0.04
## 34567   7 -68.76 153.96  3.56  0.04
## 17      4 -72.58 153.97  3.57  0.04
## 13467   7 -69.36 155.15  4.75  0.02
## 7       3 -74.38 155.23  4.83  0.02
## 12347   7 -69.42 155.28  4.88  0.02
## 23467   7 -69.46 155.35  4.95  0.02
## 157     5 -72.09 155.44  5.04  0.02
## 47      4 -73.50 155.83  5.43  0.01
## 147     5 -72.44 156.14  5.74  0.01
## 123457  8 -68.56 156.32  5.92  0.01
## 127     5 -72.56 156.37  5.97  0.01
## 134567  8 -68.60 156.40  6.00  0.01
## 167     5 -72.58 156.40  6.00  0.01
## 234567  8 -68.66 156.52  6.12  0.01
```

```

## 57      4 -73.94 156.69  6.29  0.01
## 27      4 -74.06 156.94  6.54  0.01
## 457     5 -73.16 157.56  7.16  0.01
## 67      4 -74.38 157.57  7.17  0.01
## 247     5 -73.23 157.70  7.30  0.01
## 1457    6 -72.00 157.78  7.38  0.01
## 123467  8 -69.33 157.87  7.47  0.01
## 1567    6 -72.05 157.89  7.49  0.01
## 1257    6 -72.07 157.92  7.52  0.01
## 467     5 -73.50 158.26  7.86  0.00
## 257     5 -73.59 158.43  8.03  0.00
## 1467    6 -72.44 158.67  8.27  0.00
## 1247    6 -72.44 158.67  8.27  0.00
## 1267    6 -72.56 158.90  8.50  0.00
## 567     5 -73.92 159.10  8.70  0.00
## 1234567 9 -68.55 159.19  8.79  0.00
## 267     5 -74.06 159.37  8.97  0.00
## 2457    6 -72.86 159.51  9.11  0.00
## 4567    6 -73.13 160.06  9.66  0.00
## 2467    6 -73.23 160.24  9.84  0.00
## 14567   7 -71.95 160.34  9.94  0.00
##
## Term codes:
##          lam(dcon)          lam(drios) lam(I(tree_1000m^2))
##              1              2              3
##          lam(tree_1000m)          p(date)          p(dras)
##              4              5              6
##              p(sfrz)
##              7
##
## Model-averaged coefficients:
## (full average)
##          Estimate Std. Error z value Pr(>|z|)
## lam(Int)          -0.49996   0.62023  0.806  0.42020
## lam(tree_1000m)    0.93811   0.69158  1.356  0.17494
## lam(I(tree_1000m^2)) -1.00069   0.73134  1.368  0.17122
## p(Int)            -3.48506   0.98063  3.554  0.00038 ***
## p(sfrz)           3.20399   1.04117  3.077  0.00209 **
## p(date)           0.23773   0.45717  0.520  0.60306
## lam(dcon)         -0.04180   0.61825  0.068  0.94610
## lam(drios)        0.02220   0.20451  0.109  0.91358
## p(dras)          -0.01376   0.17237  0.080  0.93638
##
## (conditional average)
##          Estimate Std. Error z value Pr(>|z|)
## lam(Int)          -0.49996   0.62023  0.806  0.42020
## lam(tree_1000m)    1.09710   0.62042  1.768  0.07701 .
## lam(I(tree_1000m^2)) -1.26470   0.58487  2.162  0.03059 *
## p(Int)            -3.48506   0.98063  3.554  0.00038 ***
## p(sfrz)           3.20399   1.04117  3.077  0.00209 **
## p(date)           0.65547   0.54995  1.192  0.23331
## lam(dcon)         -0.13776   1.11654  0.123  0.90180
## lam(drios)        0.09874   0.42251  0.234  0.81522
## p(dras)          -0.06337   0.36566  0.173  0.86240

```

```
## ---
## Signif. codes:  0 '***' 0.001 '**' 0.01 '*' 0.05 '.' 0.1 ' ' 1

ss <- match(rownames(get(sprintf("UMF.%s", spp))@y), cam.data$cdg)
prd <- predict(get(sprintf("mavg%s.%s", mod, spp)), type='state')
dtf <- data.frame(fit=prd$fit, se.fit=prd$se.fit, hunting=cam.data[ss, "hunting"], dcon=cam.data[ss, "dcon"])
ggplot(dtf, aes(y=dcon, x=tree_1000m, size=fit, colour=se.fit)) +
  geom_point() + ylab("Distance to conucos (m)") + xlab("Tree cover (% in 1km buffer)") +
  labs(title=spp, size='Predicted values', colour='Prediction S.E.')
```

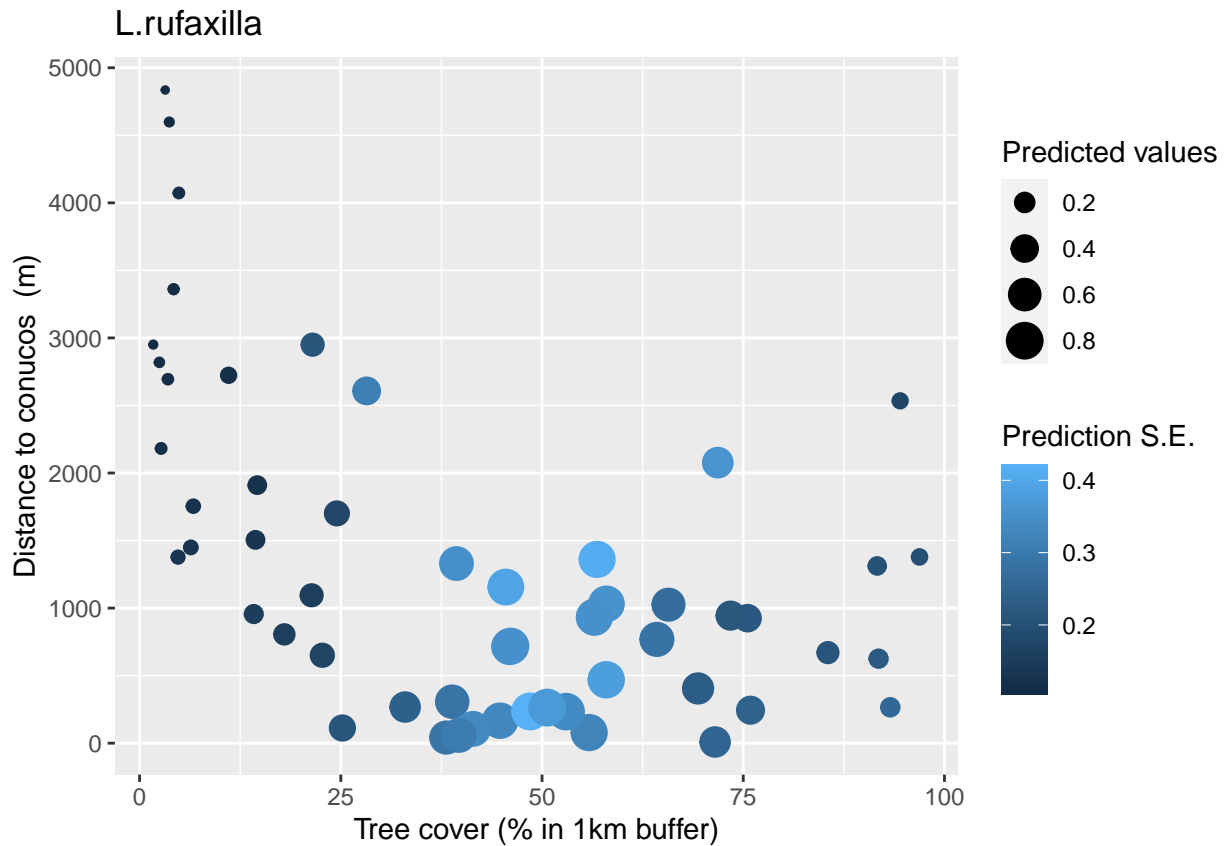

### M.gouazoubira

No sign of lack of fit, c-hat values less than 1

```
spp <- "M.gouazoubira"
mod <- ifelse(spp %in% with.quad.term, "03", "01")

tbl1 %>% filter(species %in% spp) %>% select(1:5)
```

```
##           species n.detect chi.square p.value c.hat.est
## 1 M.gouazoubira      33   846.9679 0.6531 0.5205965
```

Most support for variables:

```
sw(get(sprintf("oms%s.%s", mod, spp)))
```

```
##           lam(tree_1000m) p(sfrz) lam(dcon) lam(drios) p(date)
## Sum of weights:         1.00      0.97   0.57   0.30      0.22
## N containing models:    32       32    32    32       32
```

```

##                               p(dras)
## Sum of weights:                0.22
## N containing models:          32

Summary of model averaging estimates (use conditional average):
summary(get(sprintf("mavg%s.%s",mod,spp)))

##
## Call:
## model.avg(object = get.models(object = oms01, subset = delta <
##      10))
##
## Component model call:
## occurN(formula = ~<24 unique rhs>, data = UMF, K = 50)
##
## Component models:
##      df logLik   AICc delta weight
## 136    5 -78.64 168.53  0.00  0.22
##   36    4 -80.02 168.86  0.32  0.19
## 1236    6 -77.95 169.69  1.15  0.12
## 1356    6 -78.64 171.06  2.53  0.06
## 1346    6 -78.64 171.07  2.54  0.06
##   346    5 -79.95 171.15  2.62  0.06
##   356    5 -79.97 171.19  2.65  0.06
##   236    5 -80.00 171.25  2.72  0.06
## 12356    7 -77.95 172.33  3.80  0.03
## 12346    7 -77.95 172.34  3.80  0.03
## 2346    6 -79.92 173.63  5.09  0.02
## 3456    6 -79.92 173.63  5.10  0.02
## 2356    6 -79.93 173.64  5.11  0.02
## 13456    7 -78.64 173.71  5.18  0.02
##   13    4 -83.13 175.08  6.54  0.01
## 123456    8 -77.95 175.10  6.57  0.01
##    3    3 -84.79 176.07  7.54  0.01
##   123    5 -82.44 176.13  7.60  0.00
## 23456    7 -79.87 176.18  7.64  0.00
##   134    5 -83.12 177.48  8.95  0.00
##   135    5 -83.13 177.51  8.98  0.00
##   34    4 -84.65 178.12  9.58  0.00
##   35    4 -84.69 178.20  9.67  0.00
##   23    4 -84.78 178.37  9.84  0.00
##
## Term codes:
##      lam(dcon)      lam(drios) lam(tree_1000m)      p(date)      p(dras)
##           1              2              3              4              5
##      p(sfrz)
##           6
##
## Model-averaged coefficients:
## (full average)
##      Estimate Std. Error z value Pr(>|z|)
## lam(Int)      -0.33615    1.28549  0.261  0.79371
## lam(dcon)      -0.59391    0.70928  0.837  0.40240
## lam(tree_1000m) 1.13872    0.28034  4.062 4.87e-05 ***

```

```
## p(Int)          -4.62624    1.43921    3.214    0.00131 **
## p(sfrz)         2.21285    0.95209    2.324    0.02011 *
## lam(drios)      0.07215    0.19568    0.369    0.71235
## p(dras)         0.00967    0.17808    0.054    0.95669
## p(date)        -0.01368    0.18180    0.075    0.94003
##
## (conditional average)
##               Estimate Std. Error z value Pr(>|z|)
## lam(Int)      -0.33615    1.28549    0.261    0.79371
## lam(dcon)     -1.03516    0.64813    1.597    0.11023
## lam(tree_1000m) 1.13872    0.28034    4.062 4.87e-05 ***
## p(Int)        -4.62624    1.43921    3.214    0.00131 **
## p(sfrz)        2.27752    0.88638    2.569    0.01019 *
## lam(drios)     0.24182    0.29549    0.818    0.41313
## p(dras)         0.04384    0.37718    0.116    0.90747
## p(date)        -0.06171    0.38233    0.161    0.87177
## ---
## Signif. codes:  0 '***' 0.001 '**' 0.01 '*' 0.05 '.' 0.1 ' ' 1
```

```
ss <- match(rownames(get(sprintf("UMF.%s", spp))@y), cam.data$cdg)
prd <- predict(get(sprintf("mavg%s.%s", mod, spp)), type='state')
dtf <- data.frame(fit=prd$fit, se.fit=prd$se.fit, hunting=cam.data[ss, "hunting"], dcon=cam.data[ss, "dcon"])
ggplot(dtf, aes(y=dcon, x=tree_1000m, size=fit, colour=se.fit)) +
  geom_point() + ylab("Distance to conucos (m)") + xlab("Tree cover (% in 1km buffer)") +
  labs(title=spp, size='Predicted values', colour='Prediction S.E.')
```

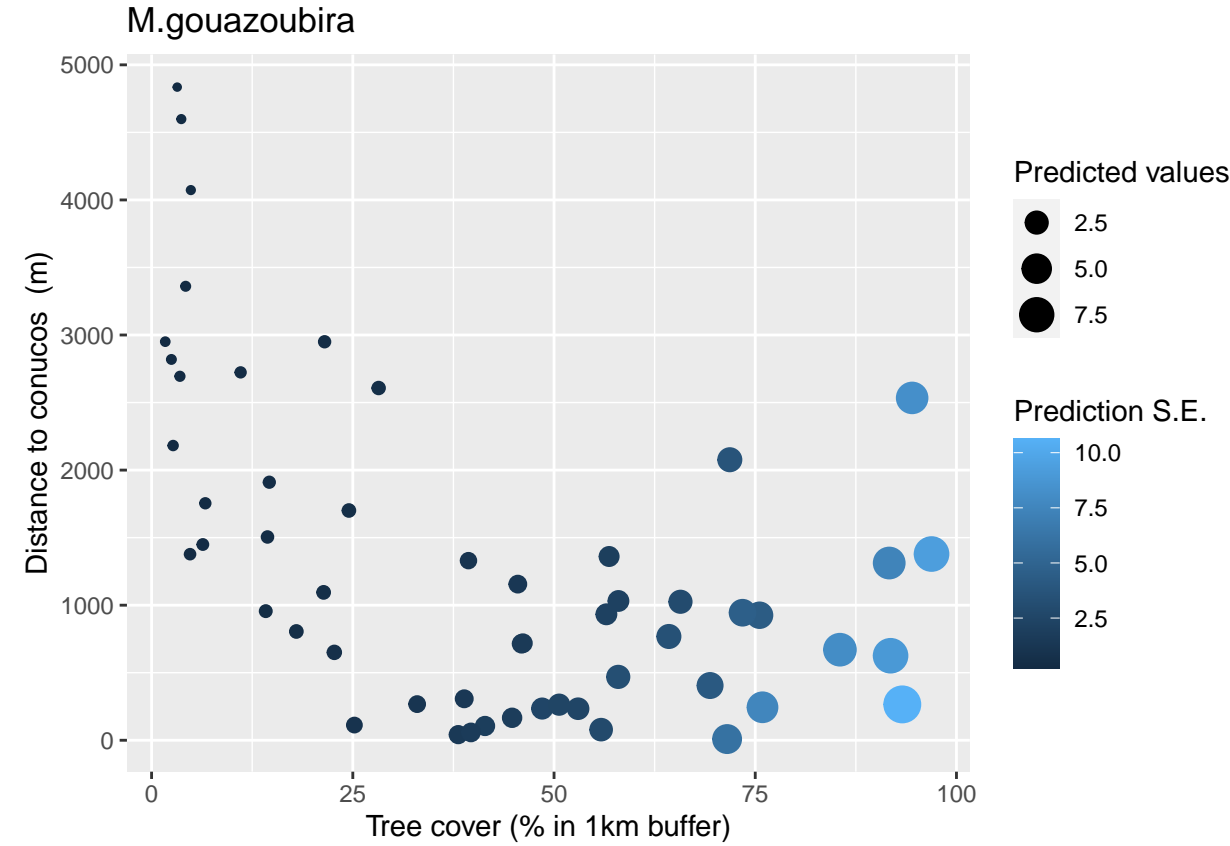

## D.leporina

No sign of lack of fit, c-hat values less than 1

```
spp <- "D.leporina"
mod <- ifelse(spp %in% with.quad.term,"03","01")

tbl1 %>% filter(species %in% spp) %>% select(1:5)
```

```
##      species n.detect chi.square p.value c.hat.est
## 1 D.leporina      66   1093.789  0.7151 0.5210335
```

Most support for variables:

```
sw(get(sprintf("oms%s.%s",mod,spp)))
```

```
##              lam(tree_1000m) p(sfrz) lam(drios) p(dras) lam(dcon)
## Sum of weights:           1.00         0.98    0.43         0.42    0.31
## N containing models:       32          32     32          32     32
##              p(date)
## Sum of weights:           0.29
## N containing models:       32
```

Summary of model averaging estimates (use conditional average):

```
summary(get(sprintf("mavg%s.%s",mod,spp)))
```

```
##
## Call:
## model.avg(object = get.models(object = oms01, subset = delta <
##      10))
##
## Component model call:
## occuRN(formula = ~<24 unique rhs>, data = UMF, K = 50)
##
## Component models:
##      df logLik  AICc delta weight
## 236   5 -104.89 221.04  0.00  0.14
## 36    4 -106.13 221.09  0.05  0.14
## 356   5 -105.06 221.36  0.32  0.12
## 136   5 -105.33 221.91  0.87  0.09
## 2356  6 -104.11 222.01  0.98  0.09
## 3456  6 -104.51 222.82  1.78  0.06
## 1236  6 -104.62 223.04  2.00  0.05
## 2346  6 -104.63 223.05  2.01  0.05
## 1356  6 -104.69 223.16  2.12  0.05
## 346   5 -105.97 223.19  2.15  0.05
## 23456 7 -103.50 223.43  2.39  0.04
## 1346  6 -104.99 223.77  2.73  0.04
## 12356 7 -104.02 224.48  3.44  0.02
## 13456 7 -104.03 224.50  3.47  0.02
## 12346 7 -104.27 224.97  3.93  0.02
## 123456 8 -103.35 225.90  4.87  0.01
## 35    4 -110.04 228.89  7.86  0.00
## 13    4 -110.25 229.31  8.27  0.00
## 3     3 -111.42 229.31  8.28  0.00
## 23    4 -110.38 229.57  8.53  0.00
## 235   5 -109.30 229.84  8.80  0.00
```

```

## 135      5 -109.48 230.21  9.18  0.00
## 345      5 -109.75 230.76  9.72  0.00
## 123      5 -109.79 230.83  9.80  0.00
##
## Term codes:
##      lam(dcon)      lam(drios) lam(tree_1000m)      p(date)      p(dras)
##      1          2          3          4          5
##      p(sfrz)
##      6
##
## Model-averaged coefficients:
## (full average)
##      Estimate Std. Error z value Pr(>|z|)
## lam(Int)      -0.54672   0.39949  1.369  0.17114
## lam(drios)    -0.14321   0.22857  0.627  0.53096
## lam(tree_1000m) 1.12224   0.23507  4.774 1.80e-06 ***
## p(Int)        -2.70254   0.63155  4.279 1.88e-05 ***
## p(sfrz)        1.73029   0.61870  2.797  0.00516 **
## p(dras)        0.20053   0.32625  0.615  0.53878
## lam(dcon)     -0.14991   0.37141  0.404  0.68648
## p(date)       0.07737   0.20506  0.377  0.70596
##
## (conditional average)
##      Estimate Std. Error z value Pr(>|z|)
## lam(Int)      -0.5467   0.3995  1.369  0.17114
## lam(drios)    -0.3321   0.2417  1.374  0.16953
## lam(tree_1000m) 1.1222   0.2351  4.774 1.80e-06 ***
## p(Int)        -2.7025   0.6315  4.279 1.88e-05 ***
## p(sfrz)        1.7556   0.5865  2.993  0.00276 **
## p(dras)        0.4762   0.3485  1.366  0.17185
## lam(dcon)     -0.4806   0.5323  0.903  0.36658
## p(date)       0.2656   0.3072  0.865  0.38730
## ---
## Signif. codes:  0 '***' 0.001 '**' 0.01 '*' 0.05 '.' 0.1 ' ' 1

ss <- match(rownames(get(sprintf("UMF.%s", spp))@y), cam.data$cdg)
prd <- predict(get(sprintf("mavg%s.%s", mod, spp)), type='state')
dtf <- data.frame(fit=prd$fit, se.fit=prd$se.fit, hunting=cam.data[ss, "hunting"], dcon=cam.data[ss, "dcon"])
ggplot(dtf, aes(y=dcon, x=tree_1000m, size=fit, colour=se.fit)) +
  geom_point() + ylab("Distance to conucos (m)") + xlab("Tree cover (% in 1km buffer)") +
  labs(title=spp, size='Predicted values', colour='Prediction S.E.')

```



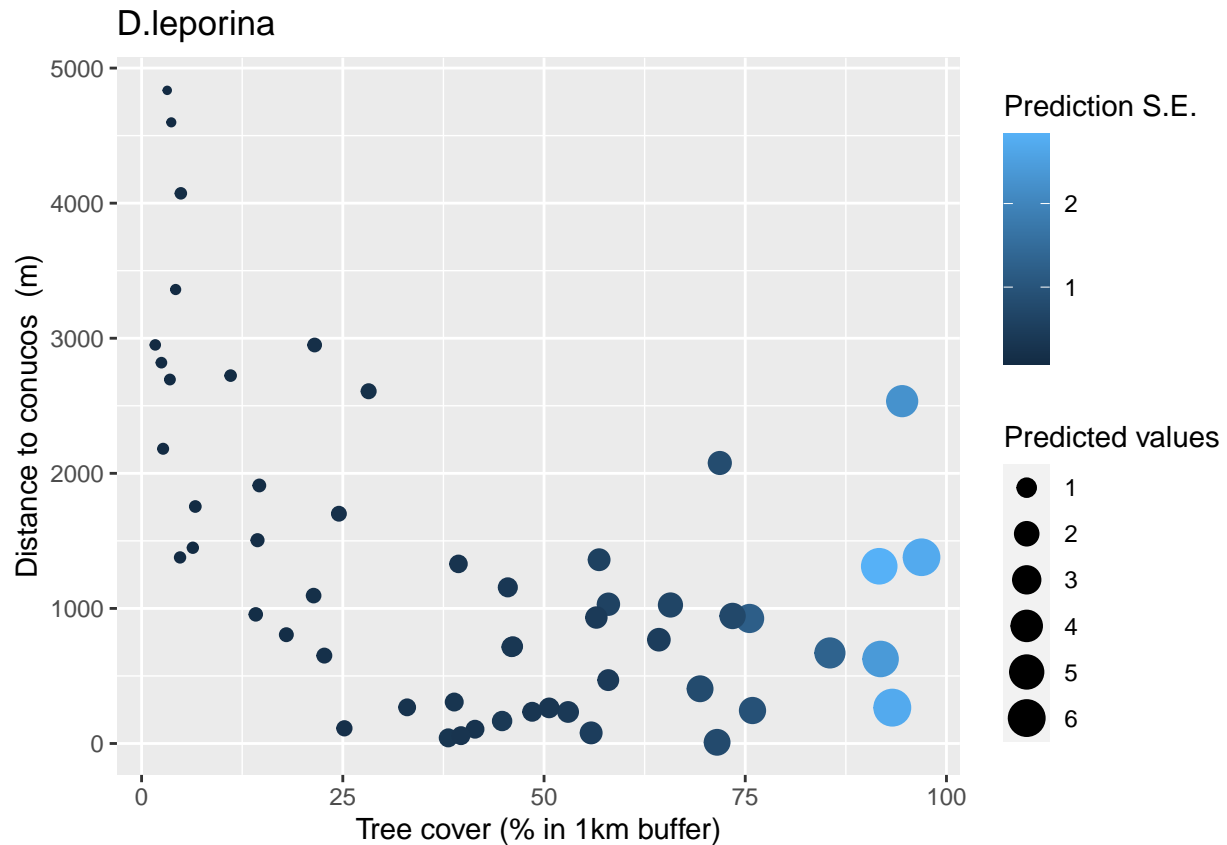

### C.paca

No sign of lack of fit, c-hat values less than 1

```
spp <- "C.paca"
mod <- ifelse(spp %in% with.quad.term,"03","01")

tbl1 %>% filter(species %in% spp) %>% select(1:5)
```

```
## species n.detect chi.square p.value c.hat.est
## 1 C.paca      71  966.5061  0.8243  0.4413452
```

Most support for variables:

```
sw(get(sprintf("oms%s.%s",mod,spp)))
```

```
##                p(sfrz) p(dras) lam(dcon) lam(drios) lam(tree_1000m)
## Sum of weights:    0.97   0.92   0.87     0.31     0.30
## N containing models: 32     32     32     32     32
##
##                p(date)
## Sum of weights:    0.25
## N containing models: 32
```

Summary of model averaging estimates (use conditional average):

```
summary(get(sprintf("mavg%s.%s",mod,spp)))
```

```
##
## Call:
```

```

## model.avg(object = get.models(object = oms01, subset = delta <
## 10))
##
## Component model call:
## occuRN(formula = ~<27 unique rhs>, data = UMF, K = 50)
##
## Component models:
##      df logLik  AICc delta weight
## 156    5 -114.63 240.51 0.00 0.32
## 1256   6 -114.31 242.41 1.89 0.12
## 1356   6 -114.45 242.69 2.18 0.11
## 1456   6 -114.46 242.71 2.20 0.11
## 12356  7 -114.04 244.51 4.00 0.04
## 12456  7 -114.14 244.72 4.21 0.04
## 13456  7 -114.26 244.96 4.44 0.03
## 2356   6 -115.78 245.36 4.84 0.03
## 356    5 -117.06 245.37 4.85 0.03
## 16     4 -118.38 245.58 5.07 0.03
## 256    5 -117.38 246.01 5.49 0.02
## 56     4 -118.93 246.67 6.15 0.01
## 123456 8 -113.85 246.89 6.38 0.01
## 146    5 -117.94 247.13 6.62 0.01
## 3456   6 -116.75 247.28 6.76 0.01
## 126    5 -118.07 247.40 6.88 0.01
## 15     4 -119.31 247.43 6.92 0.01
## 23456  7 -115.54 247.51 6.99 0.01
## 136    5 -118.22 247.70 7.18 0.01
## 2456   6 -117.22 248.23 7.72 0.01
## 456    5 -118.69 248.63 8.12 0.01
## 1246   6 -117.64 249.07 8.56 0.00
## 1346   6 -117.74 249.27 8.76 0.00
## 145    5 -119.01 249.28 8.76 0.00
## 135    5 -119.06 249.38 8.86 0.00
## 125    5 -119.09 249.43 8.92 0.00
## 1236   6 -117.83 249.44 8.93 0.00
##
## Term codes:
##      lam(dcon)      lam(drios) lam(tree_1000m)      p(date)      p(dras)
##           1              2              3              4              5
##      p(sfrz)
##           6
##
## Model-averaged coefficients:
## (full average)
##      Estimate Std. Error z value Pr(>|z|)
## lam(Int)      -0.60703    0.39003  1.556 0.119623
## lam(dcon)     -1.09246    0.65289  1.673 0.094277 .
## p(Int)        -2.32967    0.61499  3.788 0.000152 ***
## p(dras)        0.82161    0.39147  2.099 0.035836 *
## p(sfrz)        1.71387    0.64584  2.654 0.007961 **
## lam(drios)    -0.08817    0.21720  0.406 0.684776
## lam(tree_1000m) 0.06292    0.16725  0.376 0.706762
## p(date)       -0.05039    0.18218  0.277 0.782084
##

```

```
## (conditional average)
##               Estimate Std. Error z value Pr(>|z|)
## lam(Int)      -0.6070    0.3900  1.556 0.119623
## lam(dcon)     -1.2476    0.5415  2.304 0.021224 *
## p(Int)        -2.3297    0.6150  3.788 0.000152 ***
## p(dras)        0.8816    0.3340  2.640 0.008293 **
## p(sfrz)        1.7515    0.6003  2.918 0.003524 **
## lam(drios)    -0.2880    0.3107  0.927 0.353955
## lam(tree_1000m) 0.2129    0.2504  0.850 0.395326
## p(date)       -0.2019    0.3200  0.631 0.528048
## ---
## Signif. codes:  0 '***' 0.001 '**' 0.01 '*' 0.05 '.' 0.1 ' ' 1
```

```
ss <- match(rownames(get(sprintf("UMF.%s", spp))@y), cam.data$cdg)
prd <- predict(get(sprintf("mavg%s.%s", mod, spp)), type='state')
dtf <- data.frame(fit=prd$fit, se.fit=prd$se.fit, hunting=cam.data[ss, "hunting"], dcon=cam.data[ss, "dcon"])
ggplot(dtf, aes(y=dcon, x=tree_1000m, size=fit, colour=se.fit)) +
  geom_point() + ylab("Distance to conucos (m)") + xlab("Tree cover (% in 1km buffer)") +
  labs(title=spp, size='Predicted values', colour='Prediction S.E.')
```

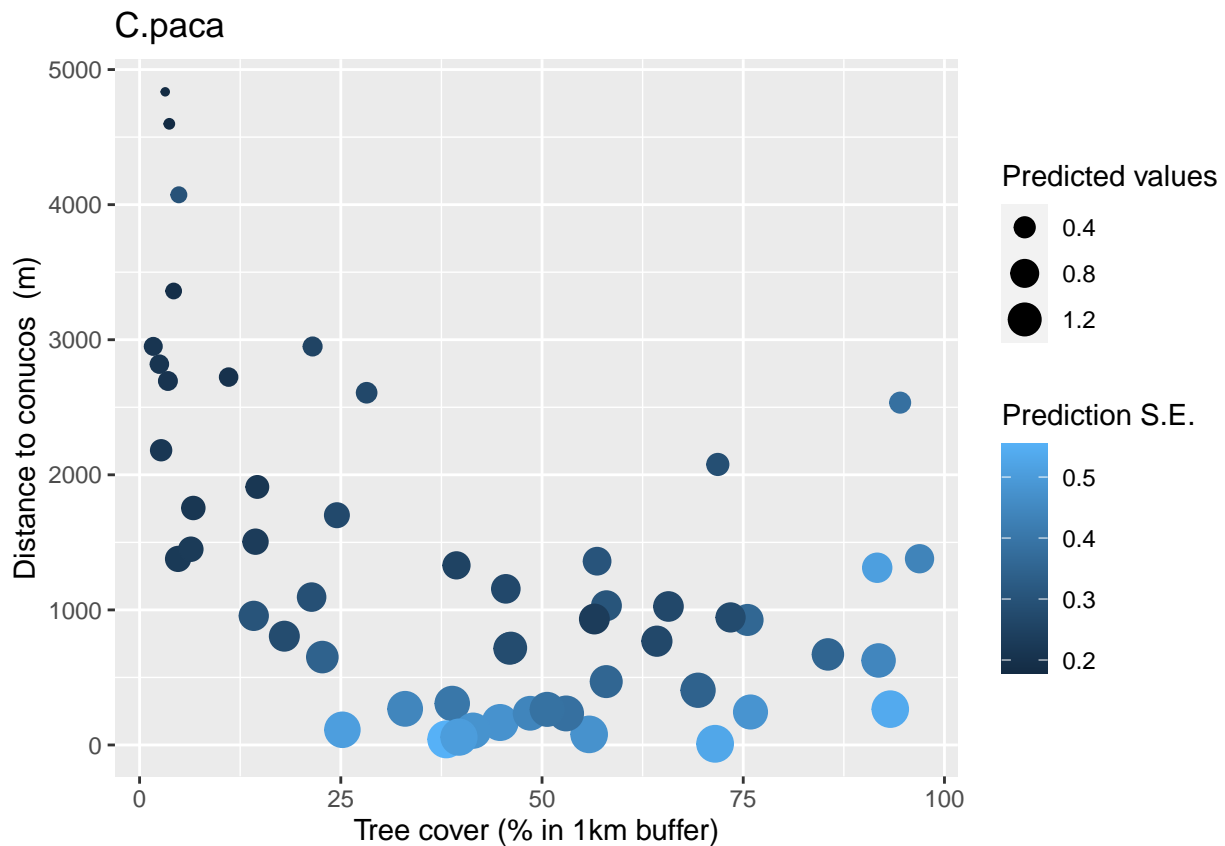

## Combining results from all species

Summary of support for all variables

```
tbl1 %>% filter(n.detect>=10) %>% arrange(n.detect) %>% pull(species) -> spps
```

```

ccs <- sws <- data.frame()
for (spp in spp) {
  ## print(spp)
  if (spp %in% with.quad.term) {
    prb <- sw(get(sprintf("oms03.%s", spp))
    mavg <- get(sprintf("mavg03.%s", spp))
  } else {
    prb <- sw(get(sprintf("oms01.%s", spp))
    mavg <- get(sprintf("mavg01.%s", spp))
  }
  sws <- rbind(sws, data.frame(spp, var=names(prb), w=prb))

  ccs <- rbind(ccs, data.frame(spp, coef(mavg, full=F), confint(mavg, full=F)))
}

```

```

dts <- dcast(sws, spp~var, value.var="w")
dts %>% select(spp, `p(sfrz)`, `p(dras)`, `p(date)`, `lam(tree_1000m)`, `lam(I(tree_1000m^2))`, `lam(dcon)`, `lam(drios)`)

```

| ##    | spp                  | p(sfrz)   | p(dras)    | p(date)   | lam(tree_1000m) |
|-------|----------------------|-----------|------------|-----------|-----------------|
| ## 1  | D.imperfecta         | 0.4494450 | 0.9551473  | 0.2276180 | 0.3753545       |
| ## 2  | P.onca               | 0.2341765 | 0.2544872  | 0.2387225 | 0.6751411       |
| ## 3  | M.tridactyla         | 0.4790563 | 0.6020121  | 0.2275080 | 0.3512140       |
| ## 4  | L.pardalis           | 0.2445099 | 0.2450353  | 0.2258898 | 0.3461923       |
| ## 5  | E.barbara            | 0.2435057 | 0.2237059  | 0.2276751 | 0.8690906       |
| ## 6  | D.novemcinctus       | 0.2246002 | 0.2282753  | 0.8502132 | 0.4065220       |
| ## 7  | M.americana          | 0.9984840 | 0.2349651  | 0.8772999 | 0.9797946       |
| ## 8  | T.major              | 0.2316186 | 0.2917358  | 0.2374788 | 0.9744634       |
| ## 9  | C.thous              | 0.4211804 | 0.2592308  | 0.2312622 | 0.5421025       |
| ## 10 | D.kappleri           | 0.6467966 | 0.4913864  | 0.4608847 | 0.9996079       |
| ## 11 | C.alector            | 0.7286448 | 0.7101610  | 0.2350957 | 0.9812248       |
| ## 12 | L.rufaxilla          | 0.9951120 | 0.2203712  | 0.3652459 | 0.8534100       |
| ## 13 | M.gouazoubira        | 0.9661162 | 0.2230601  | 0.2241691 | 0.9991263       |
| ## 14 | D.leporina           | 0.9811035 | 0.4212674  | 0.2939650 | 0.9999112       |
| ## 15 | C.paca               | 0.9683059 | 0.9240713  | 0.2538367 | 0.3020965       |
| ##    | lam(I(tree_1000m^2)) | lam(dcon) | lam(drios) |           |                 |
| ## 1  | NA                   | 0.2366762 | 0.2355505  |           |                 |
| ## 2  | NA                   | 0.2647327 | 0.3024281  |           |                 |
| ## 3  | NA                   | 0.3797467 | 0.8933935  |           |                 |
| ## 4  | NA                   | 0.2588223 | 0.2620176  |           |                 |
| ## 5  | 0.2335889            | 0.8431175 | 0.2387931  |           |                 |
| ## 6  | NA                   | 0.3182860 | 0.2283743  |           |                 |
| ## 7  | NA                   | 0.2442779 | 0.2507425  |           |                 |
| ## 8  | NA                   | 0.2529395 | 0.2418776  |           |                 |
| ## 9  | NA                   | 0.3120142 | 0.3084007  |           |                 |
| ## 10 | NA                   | 0.4706912 | 0.4476599  |           |                 |
| ## 11 | NA                   | 0.6395410 | 0.2310792  |           |                 |
| ## 12 | 0.7865129            | 0.3058415 | 0.2295178  |           |                 |
| ## 13 | NA                   | 0.5746615 | 0.3012296  |           |                 |
| ## 14 | NA                   | 0.3131305 | 0.4317585  |           |                 |
| ## 15 | NA                   | 0.8686392 | 0.3114654  |           |                 |

## Hypothesis test: effect of conucos

```
ccs %>% filter(grepl('dcon',rownames(ccs))) %>% dplyr::arrange(coef.mavg..full..F.) -> ss
##ccs %>% filter(grepl('drios',rownames(ccs))) %>% dplyr::arrange(coef.mavg..full..F.) -> ss
##ccs %>% filter(grepl('tree_1000m',rownames(ccs))) %>% dplyr::arrange(coef.mavg..full..F.) -> ss
par(mar=c(4,8,3,1))
plot(ss$coef.mavg.,1:nrow(ss),xlim=c(-3.8,3.8), pch=19,xlab=expression(hat(beta)),ylab='',axes=F,main='')
segments(ss$X2.5., 1:nrow(ss), ss$X97.5.,1:nrow(ss))
axis(1)
axis(2,1:nrow(ss),ss$spp,las=2,font=3)
box()
abline(v=0,lty=2,lwd=2,col=2)
```

## distance to nearest conuco

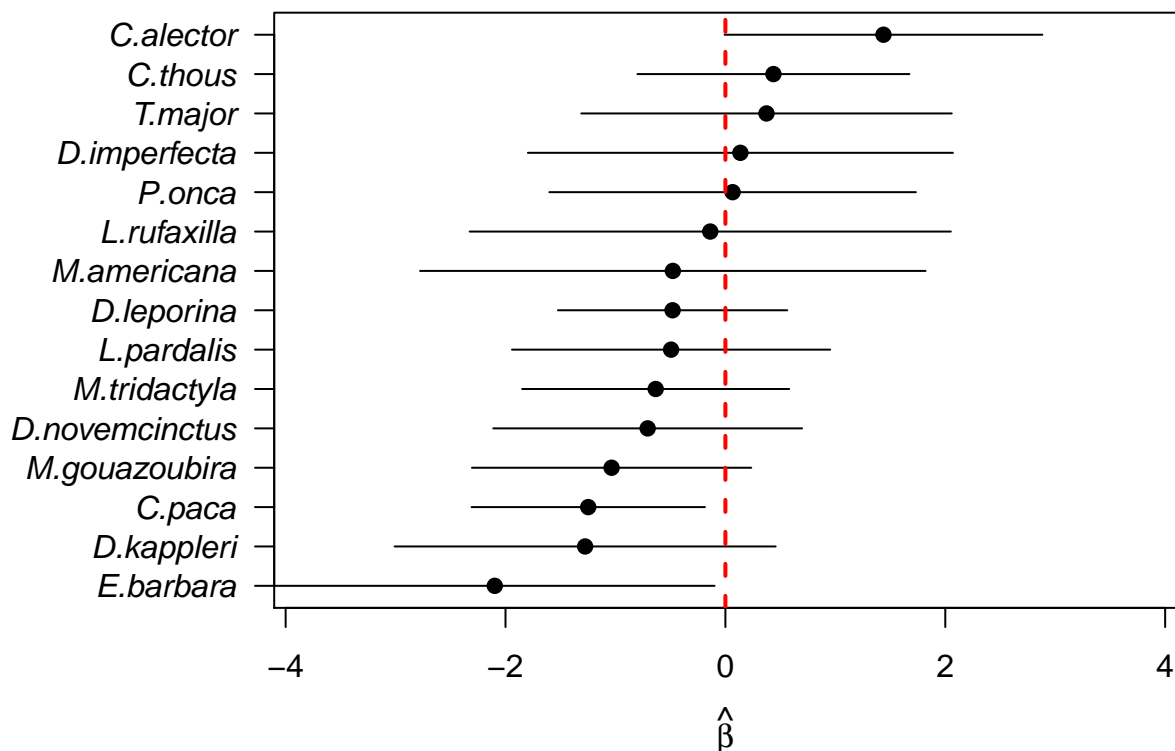

```
# dev.copy(png,file='Fig-coefficient-distance.png')
# dev.off()
```

## Predicted abundance in hunting sites

For all species reported as hunted (need to reorder plot, maybe exclude species with large uncertainty in prediction).

```
Hv <- c('C.paca'=6.336,'C.alector'=4.630, 'D.leporina'=2.681, 'T.terrestris'=2.681,'T.major'=1.949, 'M.
mtz <- data.frame()

for (k in spp[spps %in% names(Hv)]) {
  if (spp %in% with.quad.term) {
    mtz <- rbind(mtz,data.frame(species=k,abundance=predict(get(sprintf("mavg03.%s",k)),type='state')))
```

```

} else {
  mtz <- rbind(mtz,data.frame(species=k,abundance=predict(get(sprintf("mavg01.%.s",k)),type='state'))
}
}

#mtz$ hunting <- ifelse(mtz$caza==1,'yes','no')
#mtz$ hunting <- ifelse(mtz$caza>0,'yes','no')

# text_Hv1 <- textGrob(sprintf("(%)",Hv[1]), gp=gpar(fontsize=7))
# text_Hv2 <- textGrob(sprintf("(%)",Hv[2]), gp=gpar(fontsize=7))
# text_Hv3 <- textGrob(sprintf("(%)",Hv[3]), gp=gpar(fontsize=7))
# text_Hv4 <- textGrob(sprintf("(%)",Hv[4]), gp=gpar(fontsize=7))
# text_Hv5 <- textGrob(sprintf("(%)",Hv[5]), gp=gpar(fontsize=7))
# text_Hv6 <- textGrob(sprintf("(%)",Hv[6]), gp=gpar(fontsize=7))
# text_Hv8 <- textGrob(sprintf("(%)",Hv[8]), gp=gpar(fontsize=7))

# grouped boxplot
ggplot(mtz %>% filter(), aes(x=species, y=abundance, fill=hunting)) +
  geom_boxplot(notch=F) + # or notch=T
  labs(title="Model prediction of abundance at sites with and without hunting") +
  labs(y=expression( hat(lambda)), x="",caption="Species (Hv values)") +
  theme(axis.text.x = element_text( size = 7, hjust = .5, vjust=.5, face = "italic"),
  plot.margin = unit(c(1,1,2,1), "lines")) +
  coord_cartesian(clip="off")

```

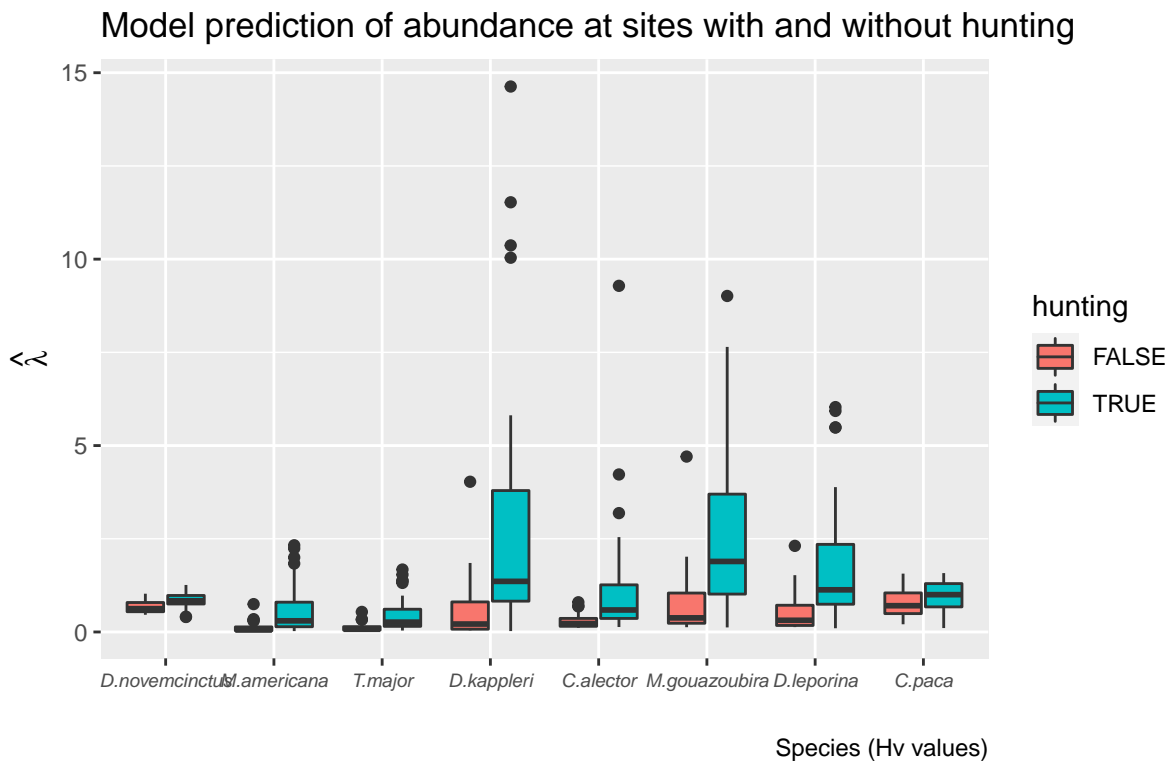

```

# P + annotation_custom(text_Hv1,xmin=1,xmax=1,ymin=-0.5,ymax=-0.5) +
# annotation_custom(text_Hv2,xmin=2,xmax=2,ymin=-0.5,ymax=-0.5) +
# annotation_custom(text_Hv3,xmin=3,xmax=4,ymin=-0.5,ymax=-0.5) +
# annotation_custom(text_Hv5,xmin=5,xmax=5,ymin=-0.5,ymax=-0.5) +
# annotation_custom(text_Hv6,xmin=6,xmax=7,ymin=-0.5,ymax=-0.5) +
# annotation_custom(text_Hv8,xmin=8,xmax=9,ymin=-0.5,ymax=-0.5)

# vjust = c(.3,.3,.3,.7,.3,.7,.3,.3,.3)
## ggsave("Fig-abundance-hunting.png",width=8,height=5)
# ggsave("Fig-abundance-hunting-with-notches.png",width=8,height=5)

```

Exclude *M.tridactyla* and *E.barbara* (predictions are unrealistic, too high).

```

exc <- c('M.tridactyla','E.barbara')

mtz <- data.frame()

for (k in spp[spp %in% names(Hv) & !(spp %in% exc)]) {
  if (spp %in% c('C.alektor','L.rufaxilla','T.tetradactyla')) {
    mtz <- rbind(mtz,data.frame(species=k,abundance=predict(get(sprintf("mavg03.%s",k)),type='state'))
  } else {
    mtz <- rbind(mtz,data.frame(species=k,abundance=predict(get(sprintf("mavg01.%s",k)),type='state'))
  }
}

# grouped boxplot
ggplot(mtz %>% filter(), aes(x=species, y=abundance, fill=hunting)) +
  geom_boxplot(notch=F) + # or notch=T
  labs(title="Model prediction of abundance at sites with and without hunting") +
  labs(y=expression( hat(lambda)), x="") +
  theme(axis.text.x = element_text( size = 7, hjust = .5, vjust=.5, face = "italic"))

```

## Model prediction of abundance at sites with and without hunting

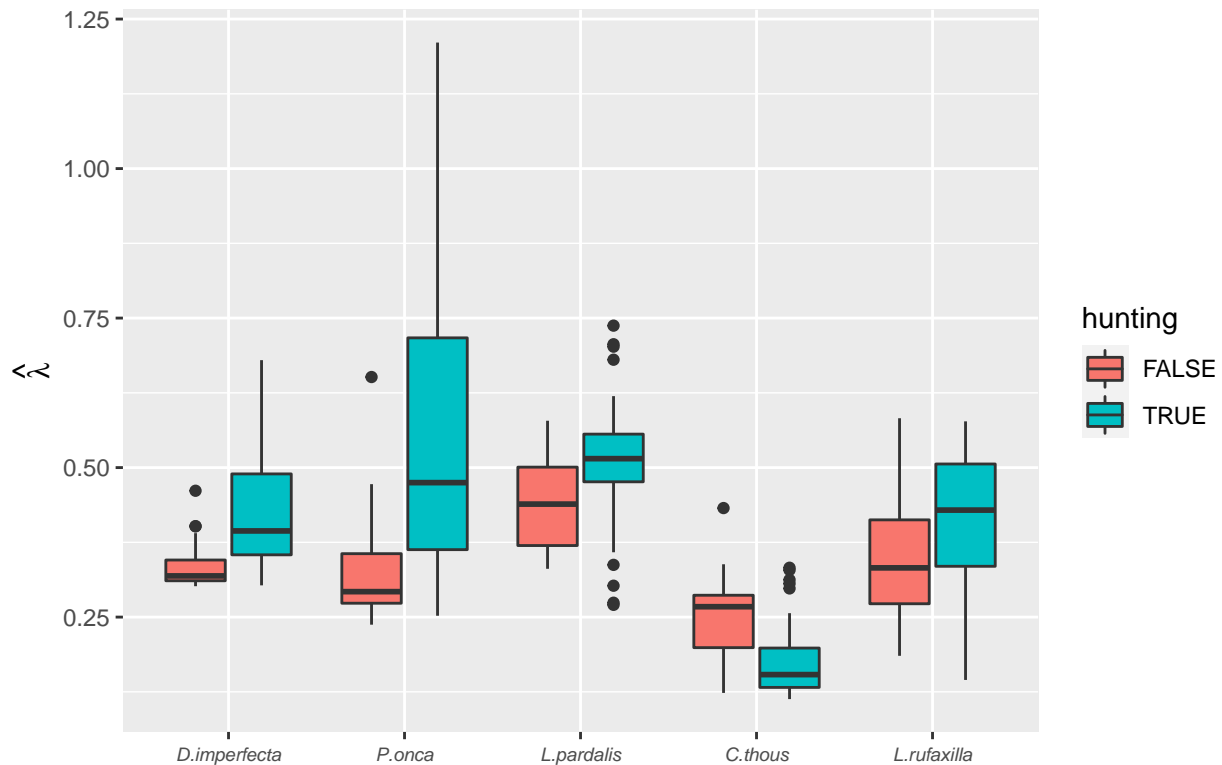

```
# ggsave("Fig-abundance-hunting-not-reported.png", width=8, height=5)
```

### Location of hunting sites

Logistic regression (binomial glm) for reported hunting sites (hunting vs. no hunting) vs. habitat and conuco variables:

```
mdl <- glm(hunting~tree_1000m+drios+dcom+dcon, data=cam.data,family=binomial)
summary(mdl)
```

```
##
## Call:
## glm(formula = hunting ~ tree_1000m + drios + dcom + dcon, family = binomial,
##      data = cam.data)
##
## Deviance Residuals:
##      Min       1Q   Median       3Q      Max
## -2.4240  -0.8136   0.3159   0.8162   1.7830
##
## Coefficients:
##              Estimate Std. Error z value Pr(>|z|)
## (Intercept) -2.5180962  1.0110348  -2.491  0.0128 *
## tree_1000m   0.0341940  0.0149561   2.286  0.0222 *
## drios        0.0010746  0.0005327   2.017  0.0437 *
## dcom         0.0002970  0.0001640   1.811  0.0702 .
## dcon        -0.0005164  0.0003071  -1.682  0.0926 .
## ---
```



```
## Signif. codes:  0 '***' 0.001 '**' 0.01 '*' 0.05 '.' 0.1 ' ' 1
##
## (Dispersion parameter for binomial family taken to be 1)
##
##   Null deviance: 82.108  on 59  degrees of freedom
## Residual deviance: 58.950  on 55  degrees of freedom
## AIC: 68.95
##
## Number of Fisher Scoring iterations: 5
```
